# Supplementary material for: Development of a triazinedione-based dehydrative condensing reagent containing 4-(dimethylamino)pyridine as an acyl transfer catalyst
Source: Royal Society of Chemistry journal article supplement (doi:10.1039/d1ob00450f), 2021-01-01

**Supplementary Information for**  
**Development of a triazinedione-based dehydrative condensing**  
**reagent containing 4-(dimethylamino)pyridine as an acyl transfer**  
**catalyst**

Jie Liu,<sup>a</sup> Hikaru Fujita,<sup>a</sup> Masanori Kitamura,<sup>b</sup> Daichi Shimada<sup>a</sup> and Munetaka Kunishima<sup>\*a</sup>

<sup>a</sup>Faculty of Pharmaceutical Sciences, Institute of Medical, Pharmaceutical, and Health  
Sciences, Kanazawa University, Kakuma-machi, Kanazawa 920-1192, Japan

<sup>b</sup>Faculty of Pharmaceutical Sciences, Matsuyama University, 4-2, Bunkyo-cho, Matsuyama  
790-8578, Japan

|                                                     |     |
|-----------------------------------------------------|-----|
| 1. General information                              | S2  |
| 2. Experimental procedure and characterization data | S2  |
| 3. References                                       | S9  |
| 4. <sup>1</sup> H and <sup>13</sup> C NMR spectra   | S10 |

## 1. General information

Nuclear magnetic resonance [ $^1\text{H}$  NMR (400 MHz),  $^{13}\text{C}$  NMR (100 MHz)] spectra were recorded in  $\text{CDCl}_3$  on a JEOL JNM-ECS400 spectrometer. Chemical shifts for  $^1\text{H}$  NMR are reported as  $\delta$  values relative to tetramethylsilane as the internal standard and coupling constants are in hertz (Hz). The following abbreviations are used for spin multiplicity: s = singlet, d = doublet, t = triplet, m = multiplet, br = broad. Chemical shifts for  $^{13}\text{C}$  NMR were reported in ppm relative to the center line of a triplet at 77.16 ppm for  $\text{CDCl}_3$ . Reactions under microwave irradiation were performed with a Biotage Initiator. Mass spectra were measured on JMS-T100TD (DART-TOF or ESI-TOF). Analytical thin layer chromatography (TLC) was performed on Merck precoated analytical plates, 0.25 mm thick, silica gel 60 F254. Flash chromatography separations were performed using silica gel (KANTO CHEMICAL Silica Gel 60 N, spherical, neutral, 40–100 mesh) or amine-functionalized silica gel (Chromatorex NH-DM2035, Fuji Silysia Chemical). Amino acid derivative **6e** was purchased from Watanabe chemical industries and used without further purification. Other reagents were commercial grades and were used without any purification unless otherwise noted. All reactions sensitive to oxygen or moisture were conducted under a  $\text{N}_2$  atmosphere. Known compounds (**4**<sup>1</sup> and **11**<sup>2</sup>) were prepared according to the reported procedure.

## 2. Experimental procedure and characterization data

### Synthesis of ATD-DMAP

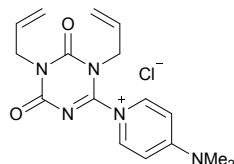

A solution of **4** (1.132 g, 4.97 mmol) and  $\text{PdCl}_2(\text{PhCN})_2$  (9.2 mg, 0.024 mmol) in THF (10.0 mL) was heated at reflux for 4 h and then cooled to room temperature. A solution of DMAP (446.3 mg, 3.65 mmol) in THF (10.0 mL) was added. After 2 h, the precipitate was separated from the supernatant and washed with THF to afford a pale yellow solid (1.155 g, 93%).  $^1\text{H}$  NMR:  $\delta$  8.85–8.78 (m, 2H), 7.29–7.21 (m, 2H), 5.97–5.79 (m, 2H), 5.42 (d,  $J = 16.9$  Hz, 1H), 5.28 (d,  $J = 10.1$  Hz, 1H), 5.23 (d,  $J = 10.6$  Hz, 1H), 5.14 (d,  $J = 16.9$  Hz, 1H), 4.73 (d,  $J = 5.5$  Hz, 2H), 4.54 (d,  $J = 6.0$  Hz, 2H), 3.46 (s, 6H);  $^{13}\text{C}$  NMR:  $\delta$  157.5, 154.9, 152.9, 149.9, 140.3, 130.5, 130.1, 119.6, 118.7, 108.2, 49.9, 45.3, 41.5; HRMS (ESI-TOF) Calcd for  $\text{C}_{16}\text{H}_{20}\text{N}_5\text{O}_2^+$  ( $[\text{M} - \text{Cl}]^+$ ): 314.1617; found: 314.1631.

### General procedure for esterification using ATD-DMAP (GP-1)

A solution of ATD-DMAP (1.2 equiv.) in  $\text{CH}_2\text{Cl}_2$  (1.50 mL) was added to a mixture of a carboxylic acid (0.4 mmol, 1 equiv.), an alcohol (1.2 equiv.), and NMM (1.2 equiv.) in  $\text{CH}_2\text{Cl}_2$  (0.50 mL) at room temperature. After 10 min, the reaction mixture was quenched by addition of *N,N*-dimethylethylenediamine (1 equiv.). After 5 min, the reaction mixture was diluted with  $\text{CHCl}_3$  (30 mL) and washed with aqueous HCl (1 M, 30 mL), saturated aqueous  $\text{NaHCO}_3$  (20 mL), and brine (70 mL). The organic layer was dried ( $\text{MgSO}_4$ ) and filtered. The filtrate was

concentrated under reduced pressure. The residue was purified by column chromatography to afford the desired ester.

### 1,3-Diphenylpropan-2-yl 3-phenylpropanoate (**8ab**)<sup>3</sup>

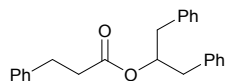

GP-1 was followed using **6a** (60.2 mg, 0.40 mmol) and **7b** (98  $\mu$ L, 0.49 mmol). Column chromatography (silica, hexane/EtOAc = 9:1) afforded the title compound (123.4 mg, 89%).

### 2-Phenethyl cyclohexanecarboxylate (**8ba**)<sup>3</sup>

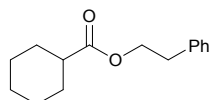

GP-1 was followed using **6b** (51.4 mg, 0.40 mmol) and **7a** (58  $\mu$ L, 0.48 mmol). Column chromatography (silica, hexane/EtOAc = 9:1) afforded the title compound (87.8 mg, 94%).

### 1,3-Diphenylpropan-2-yl cyclohexanecarboxylate (**8bb**)<sup>3</sup>

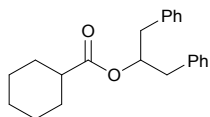

GP-1 was followed using **6b** (51.5 mg, 0.40 mmol), **7b** (98  $\mu$ L, 0.49 mmol), and *i*-Pr<sub>2</sub>EtN (84  $\mu$ L, 0.48 mmol) instead of NMM. Column chromatography (silica, hexane/EtOAc = 9:1) afforded the title compound (120.8 mg, 93%).

### 2-Phenethyl adamantane-1-carboxylate (**8ca**)<sup>3</sup>

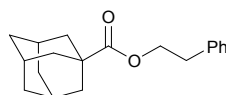

A mixture of **6c** (72.7 mg, 0.40 mmol), **7a** (58  $\mu$ L, 0.48 mmol), NMM (54  $\mu$ L, 0.49 mmol), and ATD-DMAP (169.7 mg, 0.49 mmol) in CH<sub>2</sub>Cl<sub>2</sub> (2.00 mL) was heated under microwave irradiation conditions (130  $^{\circ}$ C, 20 min), and then cooled to room temperature. *N,N*-dimethylethylenediamine (43  $\mu$ L, 0.40 mmol) was added. The reaction mixture was diluted with CHCl<sub>3</sub> (30 mL) and washed with aqueous HCl (1 M, 30 mL), saturated aqueous NaHCO<sub>3</sub> (20 mL), and brine (70 mL). The organic layer was dried (MgSO<sub>4</sub>) and filtered. The filtrate was concentrated under reduced pressure. The residue was purified by column chromatography (silica, hexane/EtOAc = 9:1) to afford the title compound (95.1 mg, 83%).

### Phenyl 3-phenylpropanoate (**8ac**)<sup>3</sup>

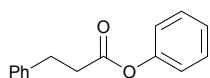

GP-1 was followed using **6a** (59.8 mg, 0.40 mmol) and **7c** (45.6 mg, 0.48 mmol). Column chromatography (silica, hexane/EtOAc = 9:1) afforded the title compound (77.2 mg, 86%).

### 2-Phenethyl benzoate (**8da**)<sup>3</sup>

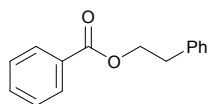

GP-1 was followed using **6d** (48.7 mg, 0.40 mmol) and **7a** (58  $\mu$ L, 0.48 mmol). Column chromatography (silica, hexane/EtOAc = 9:1) afforded the title compound (85.2 mg, 94%).

### *N*-[(Benzyloxy)carbonyl]-*L*-phenylalanine benzyl ester (**8ed**)<sup>3</sup>

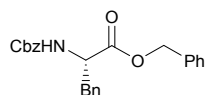

GP-1 was followed using **6e** (119.8 mg, 0.40 mmol) and **7d** (50  $\mu$ L, 0.48 mmol). Column chromatography (silica, hexane/EtOAc = 9:1) afforded the title compound (>99%ee) in quantitative yield.

HPLC analysis of **8ed**: Chiralpak IB-3 4.6 $\times$ 25 cm, 1.0 mL/min (hexane/2-propanol = 95:5), and detection at 254 or 208 nm.

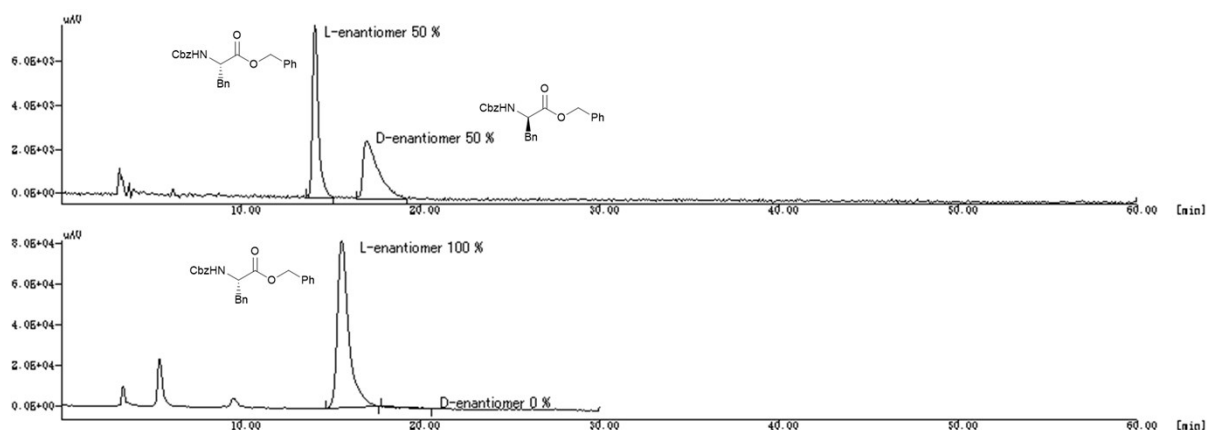

### 1-Ethynylcyclohexyl acetate (**8fe**)<sup>4</sup>

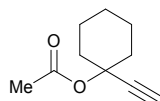

GP-1 was followed using **6f** (46  $\mu$ L, 0.80 mmol), **7e** (50.1 mg, 0.40 mmol), NMM (88  $\mu$ L, 0.80 mmol), ATD-DMAP (210.3 mg, 0.60 mmol), and molecular sieves 4A (51.6 mg). The reaction mixture was stirred for 30 h. Column chromatography (silica, hexane/CH<sub>2</sub>Cl<sub>2</sub> = 7:3) afforded the title compound (42.6 mg, 64%).

### General procedure for amidation using ATD-DMAP (GP-2)

A solution of ATD-DMAP (1.1 equiv.) in CH<sub>2</sub>Cl<sub>2</sub> (1.50 mL) was added to a mixture of a carboxylic acid (0.4 mmol, 1 equiv.) and an amine (1.1 equiv.) in CH<sub>2</sub>Cl<sub>2</sub> (0.50 mL) at room temperature. After 10 min, the reaction mixture was diluted with CHCl<sub>3</sub> (30 mL) and washed with aqueous HCl (1 M, 30 mL), saturated aqueous NaHCO<sub>3</sub> (20 mL), and brine (70 mL). The

organic layer was dried (MgSO<sub>4</sub>) and filtered. The filtrate was concentrated under reduced pressure. The residue was purified by column chromatography to afford the desired amide.

#### ***N*-(2-Phenethyl)-3-phenylpropanamide (10aa)<sup>2</sup>**

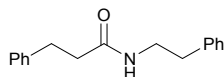

GP-2 was followed using **6a** (60.3 mg, 0.40 mmol) and **9a** (56 μL, 0.44 mmol). Column chromatography (silica, hexane/EtOAc = 7:3) afforded the title compound (94.5 mg, 93%).

#### ***N*-(2-Phenethyl)hexanamide (10ha)<sup>5</sup>**

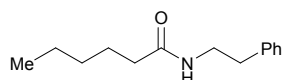

GP-2 was followed using **6h** (50 μL, 0.40 mmol) and **9a** (56 μL, 0.44 mmol). Column chromatography (amine-functionalized silica, hexane/EtOAc = 4:1) afforded the title compound (85.7 mg, 98%).

#### ***N*-(2-Phenethyl)cinnamamide (10ia)<sup>5</sup>**

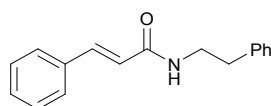

GP-2 was followed using **6i** (60.5 mg, 0.41 mmol) and **9a** (56 μL, 0.44 mmol). Column chromatography (silica, hexane/EtOAc = 4:1) afforded the title compound (95.8 mg, 93%).

#### ***N*-Phenethylpropiolamide (10ja)<sup>5</sup>**

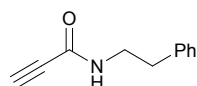

GP-2 was followed using **6j** (25 μL, 0.41 mmol) and **9a** (56 μL, 0.44 mmol). Column chromatography (amine-functionalized silica, hexane/EtOAc = 7:3) afforded the title compound (56.7 mg, 81%).

#### **4-Nitro-*N*-(2-phenethyl)benzamide (10ka)<sup>2</sup>**

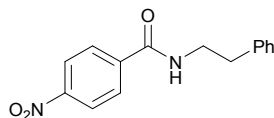

GP-2 was followed using **6k** (67.5 mg, 0.40 mmol) and **9a** (56 μL, 0.44 mmol). Column chromatography (amine-functionalized silica, hexane/EtOAc = 7:3) afforded the title compound (99.0 mg, 91%).

#### **4-Methoxy-*N*-(2-phenethyl)benzamide (10la)<sup>2</sup>**

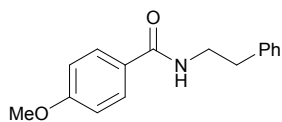

GP-2 was followed using **6l** (61.7 mg, 0.41 mmol) and **9a** (56  $\mu$ L, 0.44 mmol). Column chromatography (amine-functionalized silica, hexane/EtOAc = 4:1) afforded the title compound (95.3 mg, 92%).

### ***N*-(2-Phenethyl)pivalamide (10ma)<sup>2</sup>**

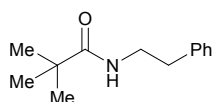

GP-2 was followed using **6m** (43.0 mg, 0.42 mmol) and **9a** (56  $\mu$ L, 0.44 mmol). The reaction mixture was stirred for 3 h. Column chromatography (amine-functionalized silica, hexane/EtOAc = 4:1) afforded the title compound (78.3 mg, 91%).

### ***N*-Benzyl-3-phenylpropanamide (10ab)<sup>5</sup>**

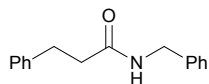

GP-2 was followed using **6a** (60.9 mg, 0.40 mmol) and **9b** (48  $\mu$ L, 0.44 mmol). Column chromatography (amine-functionalized silica, hexane/EtOAc = 7:3) afforded the title compound (90.9 mg, 94%).

### ***N,N*-Diethyl-3-phenylpropanamide (10ac)<sup>2</sup>**

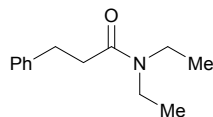

GP-2 was followed using **6a** (61.0 mg, 0.41 mmol) and **9c** (46  $\mu$ L, 0.44 mmol). Column chromatography (amine-functionalized silica, hexane/EtOAc = 7:3) afforded the title compound (83.7 mg) in quantitative yield.

### ***N*-Cyclohexylbenzamide (10dd)<sup>5</sup>**

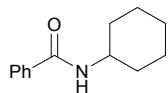

GP-2 was followed using **6d** (49.2 mg, 0.40 mmol) and **9d** (52  $\mu$ L, 0.45 mmol). Column chromatography (amine-functionalized silica, hexane/EtOAc = 7:3) afforded the title compound (82.1 mg) in quantitative yield.

### ***N*,3-Diphenylpropanamide (10ae)<sup>6</sup>**

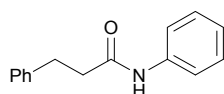

GP-2 was followed using **6a** (61.4 mg, 0.41 mmol) and **9e** (36  $\mu$ L, 0.39 mmol). The reaction mixture was stirred for 3 h. Column chromatography (amine-functionalized silica, hexane/EtOAc = 9:1) afforded the title compound (86.1 mg, 97%).

### *N*-Acetyl-L-phenylalanine methyl ester (**10nf**)<sup>5</sup>

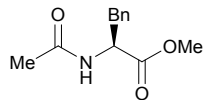

GP-2 was followed using **6n** (40.3 mg, 0.49 mmol) and **9f** (88.6 mg, 0.41 mmol). Column chromatography (amine-functionalized silica, hexane/EtOAc = 4:1) afforded the title compound (92.0 mg) in quantitative yield.

### Methyl (benzyloxy)carbonyl-L-phenylalanyl-L-alaninate (**10eg**)<sup>2</sup>

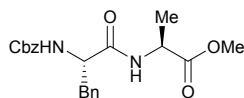

GP-2 was followed using **6e** (119.7 mg, 0.40 mmol), **9g** (61.4 mg, 0.44 mmol), Et<sub>3</sub>N (61  $\mu$ L, 0.44 mmol), and ATD-DMAP (168.8 mg, 0.48 mmol). The reaction time was 15 min. Column chromatography (amine-functionalized silica, hexane/EtOAc = 1:1) afforded the title compound (141.1 mg, 92%).

**Fig. S1** Crude <sup>1</sup>H NMR spectrum of **10eg**.

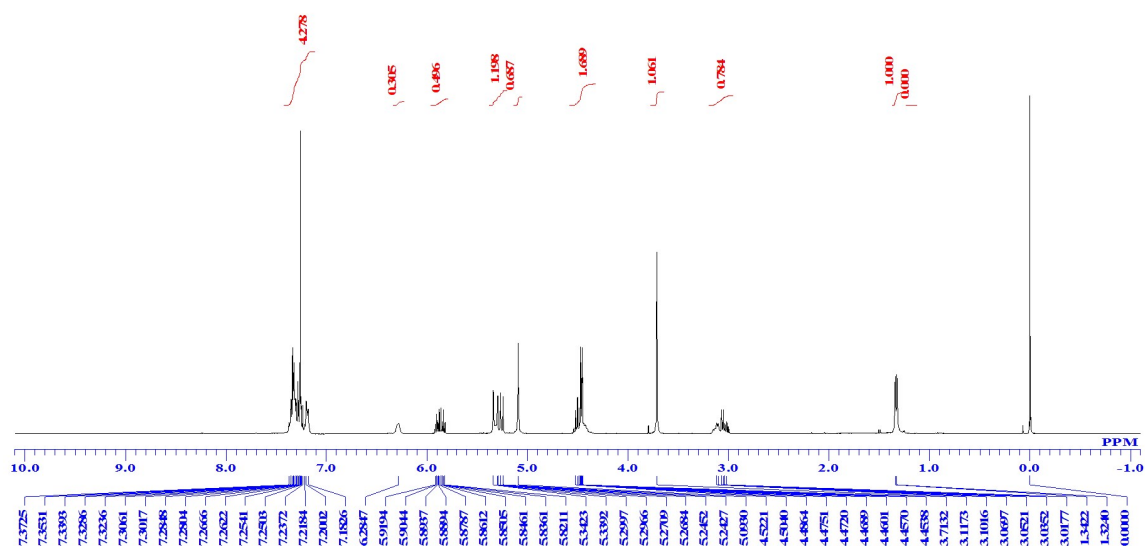

**Fig S2** Comparison of  $^1\text{H}$  NMR spectra of (A) the crude mixture of **10eg** prepared using ATD-DMAP and (B) a 1:1 mixture of **10eg** and (**D-Phe**)-**10eg** (our previous data from Ref. 2).

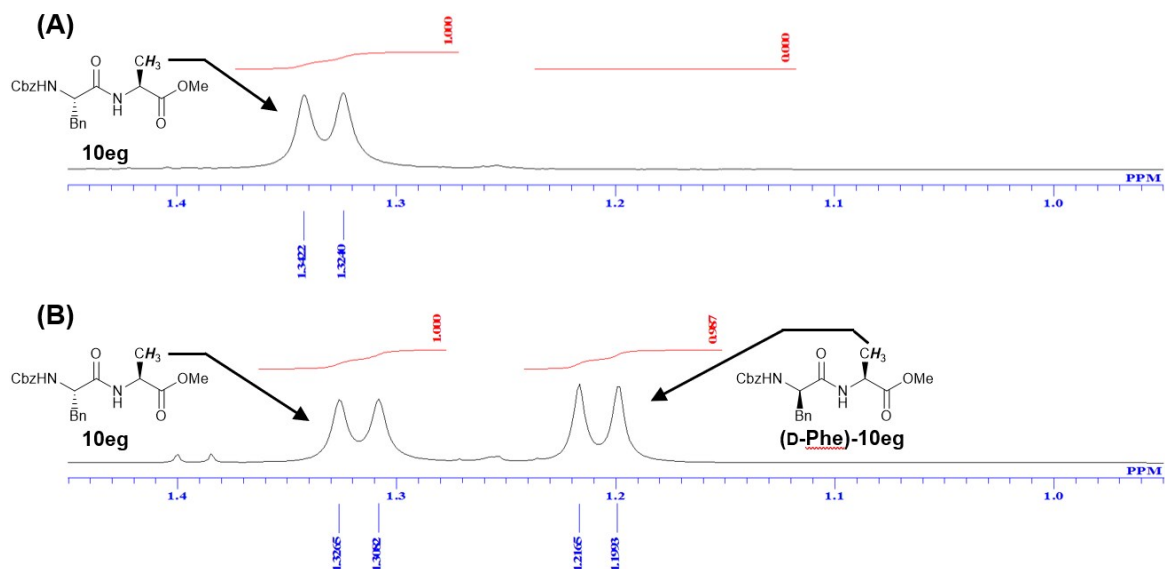

### Synthesis of triazinone-based dehydrative condensing reagent **12**.

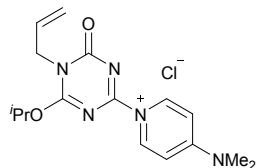

DMAP (293.0 mg, 2.4 mmol) was added to a solution of **4** (503.0 mg, 2.2 mmol) in THF (5.0 mL) at room temperature. After 2 h, the precipitate was filtered and washed with THF to afford **12** (723.4 mg, 94%) as a pale yellow solid.  $^1\text{H}$  NMR:  $\delta$  9.38–9.33 (m, 2H), 7.54–7.47 (m, 2H), 5.96–5.80 (m, 2H), 5.37–5.29 (m, 2H), 4.64–4.58 (m, 2H), 3.57 (s, 6H), 1.52 (d,  $J = 6.4$  Hz, 6H);  $^{13}\text{C}$  NMR:  $\delta$  163.4, 160.2, 158.8, 154.7, 137.0, 129.4, 120.3, 109.0, 79.0, 45.2, 42.0, 21.9; HRMS (ESI-TOF) Calcd for  $\text{C}_{16}\text{H}_{22}\text{N}_5\text{O}_2^+$  ( $[\text{M} - \text{Cl}]^+$ ): 316.3845; found: 316.3851.

### Attempted amidation using **12**.

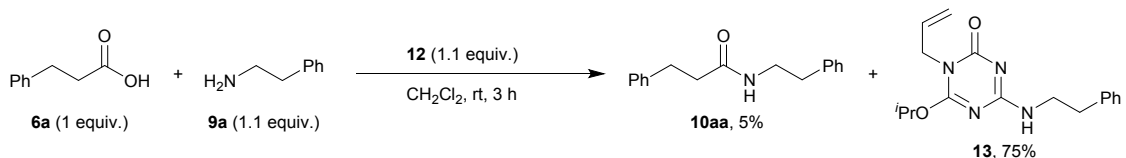

Dehydrative condensing reagent **12** (154.6 mg, 0.44 mmol) was added to a solution of **6a** (60.1 mg, 0.40 mmol) and **9a** (55.5  $\mu\text{L}$ , 0.44 mmol) in  $\text{CH}_2\text{Cl}_2$  (2.00 mL) at room temperature. After 3 h, the reaction mixture was diluted with  $\text{CH}_2\text{Cl}_2$  (5 mL) and washed with aqueous HCl (1 M, 7 mL), saturated aqueous  $\text{NaHCO}_3$  (10 mL), and brine (15 mL). The organic layer was dried ( $\text{Na}_2\text{SO}_4$ ) and filtered. The filtrate was concentrated under reduced pressure. The residue was purified by silica gel column chromatography (hexane/EtOAc = 2:1 to 1:3) and amine-



functionalized silica gel column chromatography (EtOAc) to afford **10aa** (5.3 mg, 5%) and **13** (103.8 mg, 75%) as a white solid.

**1-Allyl-6-isopropoxy-4-(2-phenethylamino)-1,3,5-triazin-2(1H)-one (13)**

<sup>1</sup>H NMR (mixture of rotamers):  $\delta$  7.36–7.17 (m, 5H), 6.42–6.28 (m, 0.4 H), 5.92–5.78 (m, 1H), 5.40–5.02 (m, 3.6H), 4.53–4.44 (m, 2H), 3.74 (dt,  $J = 6.6, 6.6$  Hz, 1.2H), 3.65 (dt,  $J = 6.7, 6.7$  Hz, 0.8H), 2.94–2.85 (m, 2H), 1.39 (d,  $J = 6.0$  Hz, 2.4H), 1.32 (d,  $J = 6.4$  Hz, 3.6H); <sup>13</sup>C NMR (mixture of rotamers):  $\delta$  164.2, 163.7, 160.6, 160.1, 156.6, 155.6, 139.4, 138.8, 131.9, 131.8, 128.9, 128.7, 128.4, 128.2, 126.3, 126.0, 117.5, 117.3, 73.3, 73.1, 43.6, 43.4, 42.5, 42.0, 36.4, 35.3, 21.6, 21.5; HRMS (DART-TOF) Calcd for C<sub>17</sub>H<sub>23</sub>N<sub>4</sub>O<sub>2</sub> ([M + H]<sup>+</sup>): 315.1821; found: 315.1840.

### 3. References

- (1) H. Fujita, R. Yamashita, T. Fujii, K. Yamada, M. Kitamura and M. Kunishima, *Eur. J. Org. Chem.*, 2019, 4436–4446.
- (2) K. Yamada, M. Kota, K. Takahashi, H. Fujita, M. Kitamura and M. Kunishima, *J. Org. Chem.*, 2019, **84**, 15042–15051.
- (3) K. Yamada, J. Liu and M. Kunishima, *Org. Biomol. Chem.*, 2018, **16**, 6569–6575.
- (4) N. Ghosh, S. Nayak and A. K. Sahoo, *J. Org. Chem.*, 2011, **76**, 500–511.
- (5) M. Kunishima, C. Kawachi, J. Morita, K. Terao, F. Iwasaki and S. Tani, *Tetrahedron*, 1999, **55**, 13159–13170.
- (6) M. Kitamura, S. Sasaki, R. Nishikawa, K. Yamada and M. Kunishima, *RSC Adv.*, 2018, **8**, 22482–22489.

## 4. $^1\text{H}$ and $^{13}\text{C}$ NMR spectra

$^1\text{H}$  NMR  
ATD-DMAP

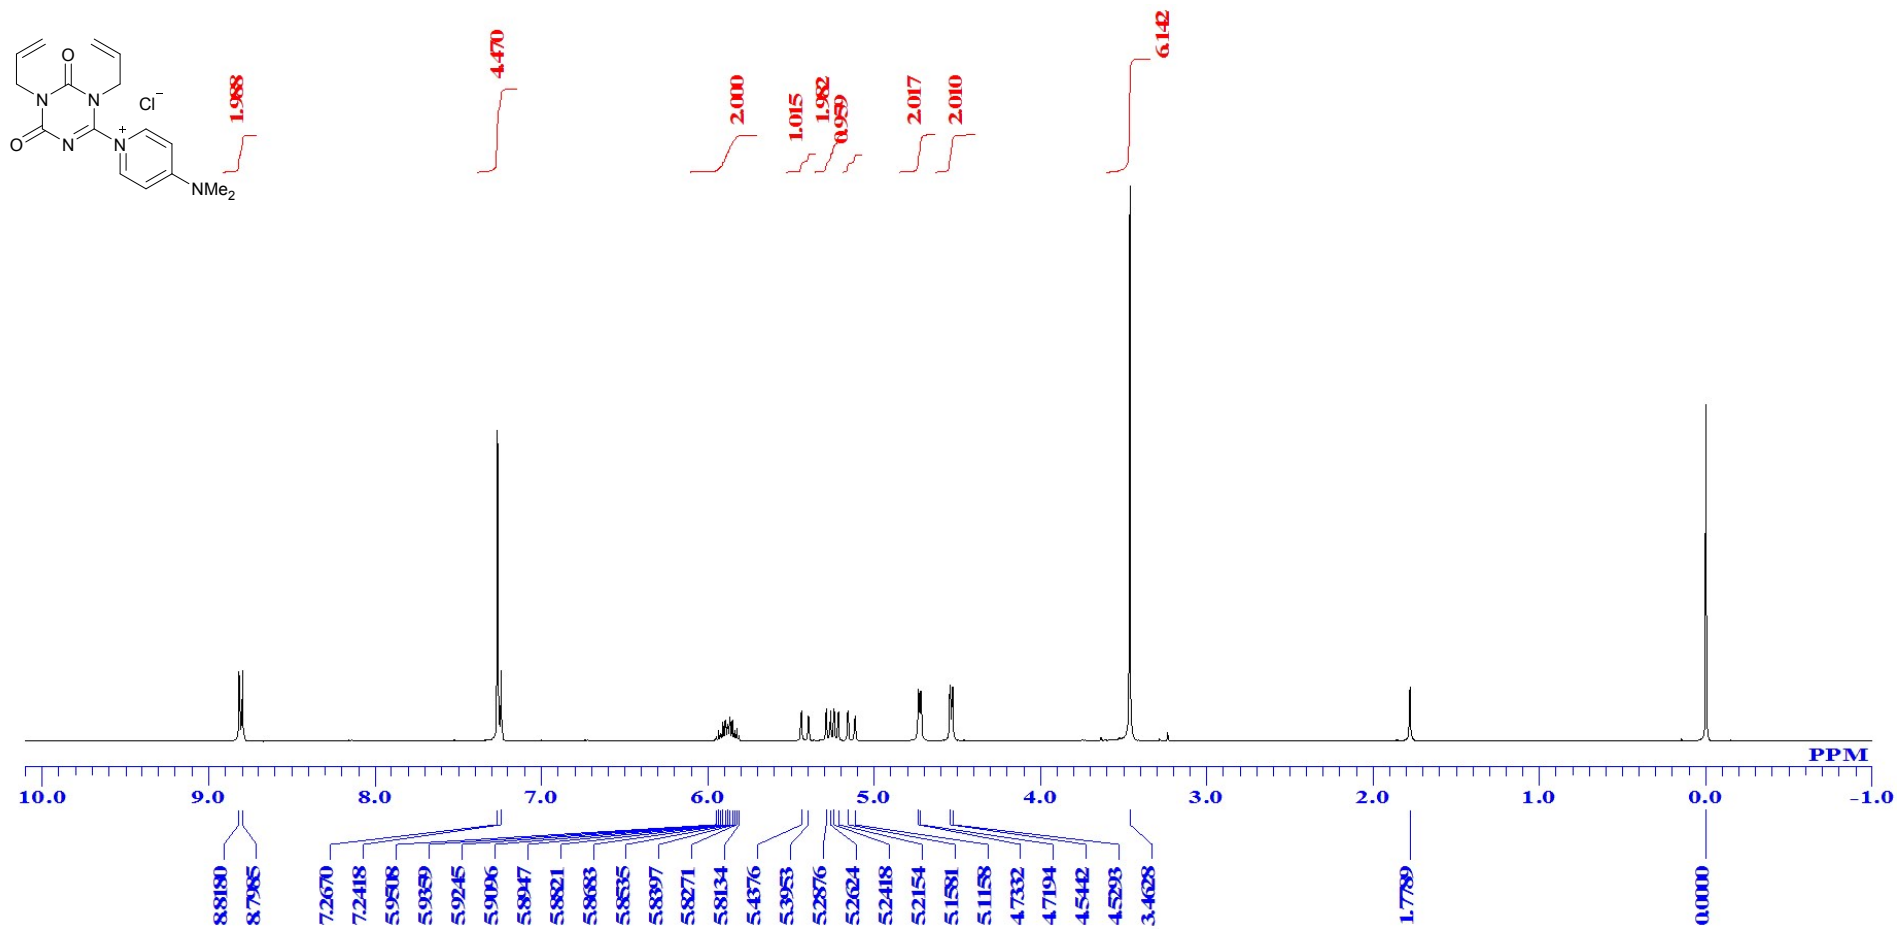

<sup>13</sup>C NMR  
ATD-DMAP

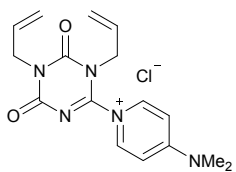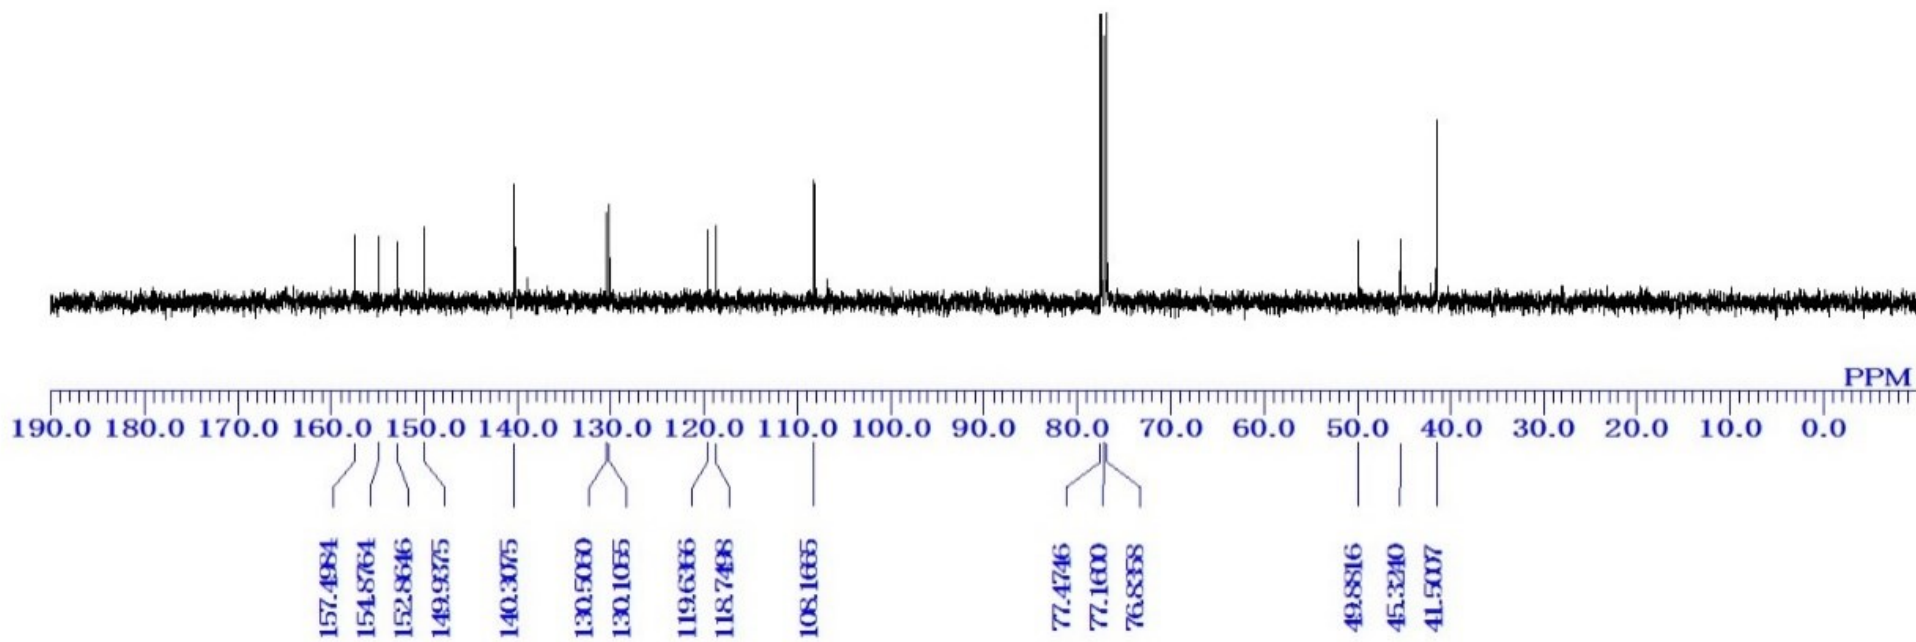

<sup>1</sup>H NMR

**8ab**

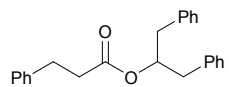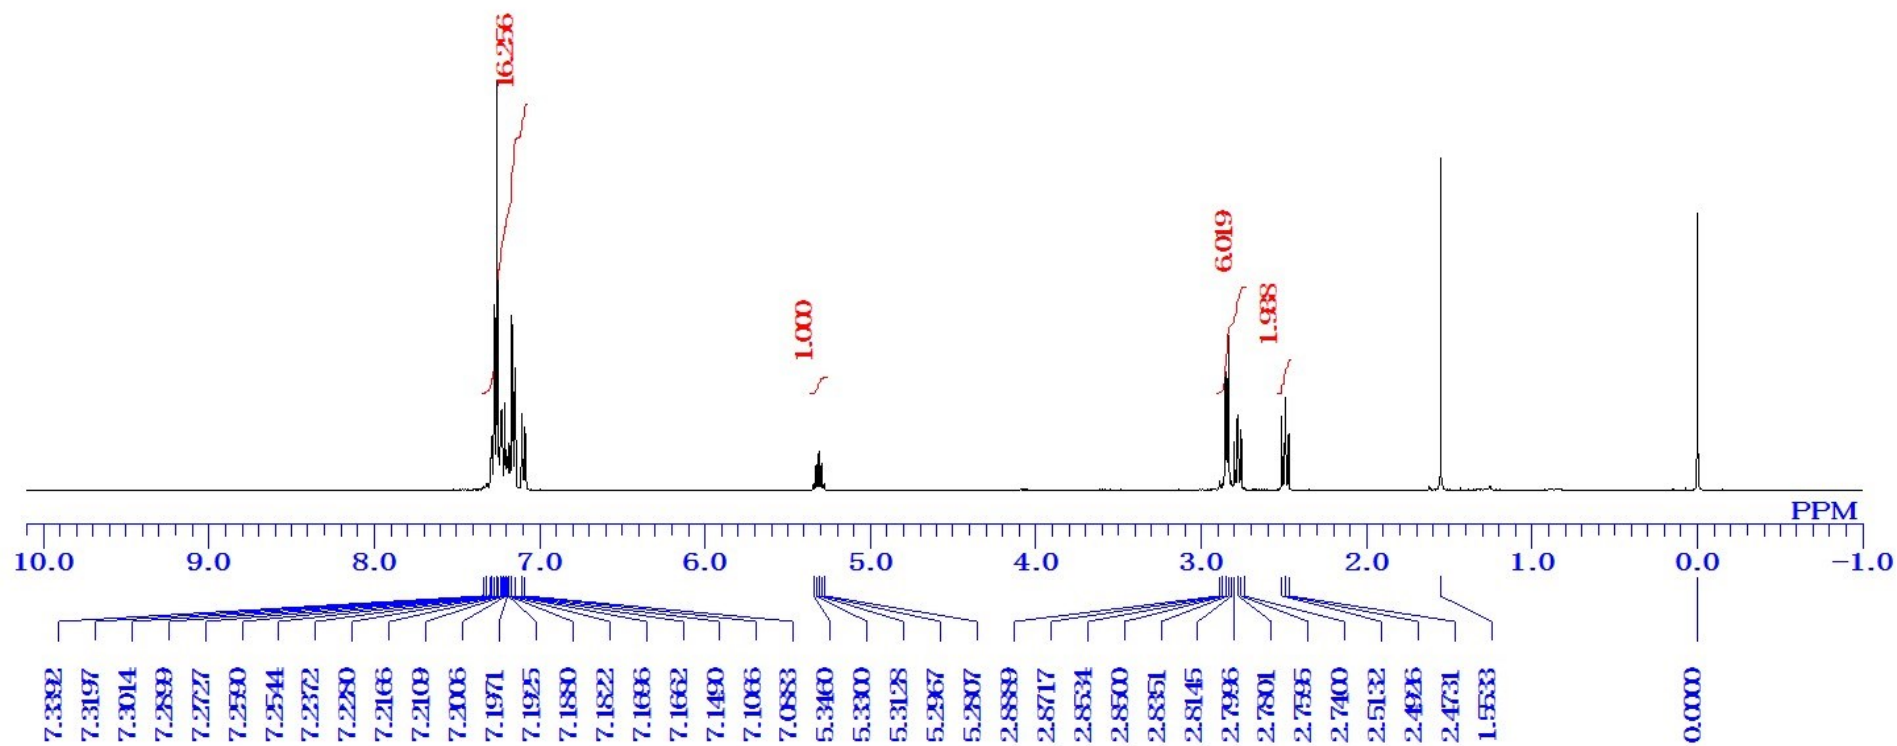

<sup>1</sup>H NMR  
8ba

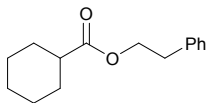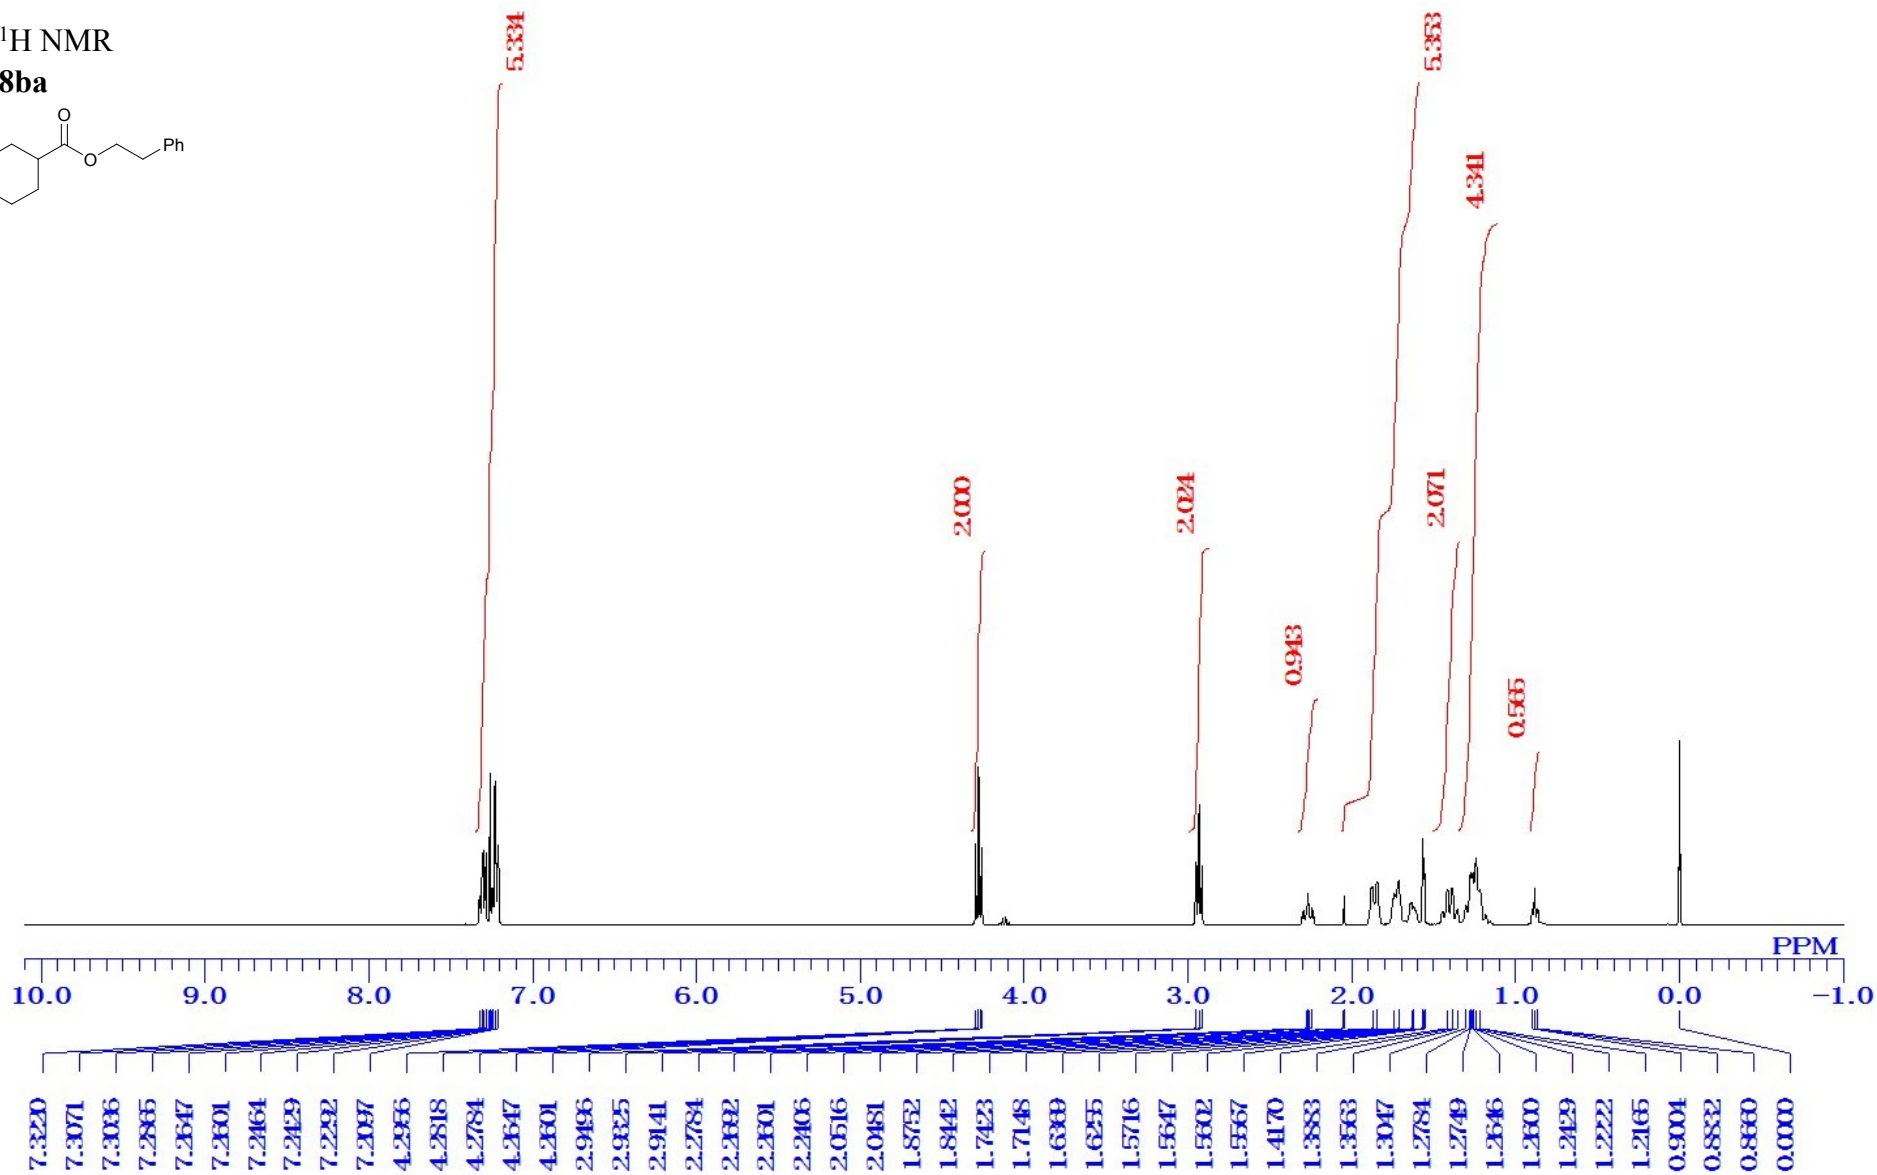

<sup>1</sup>H NMR  
8bb

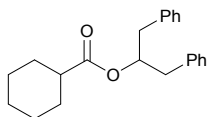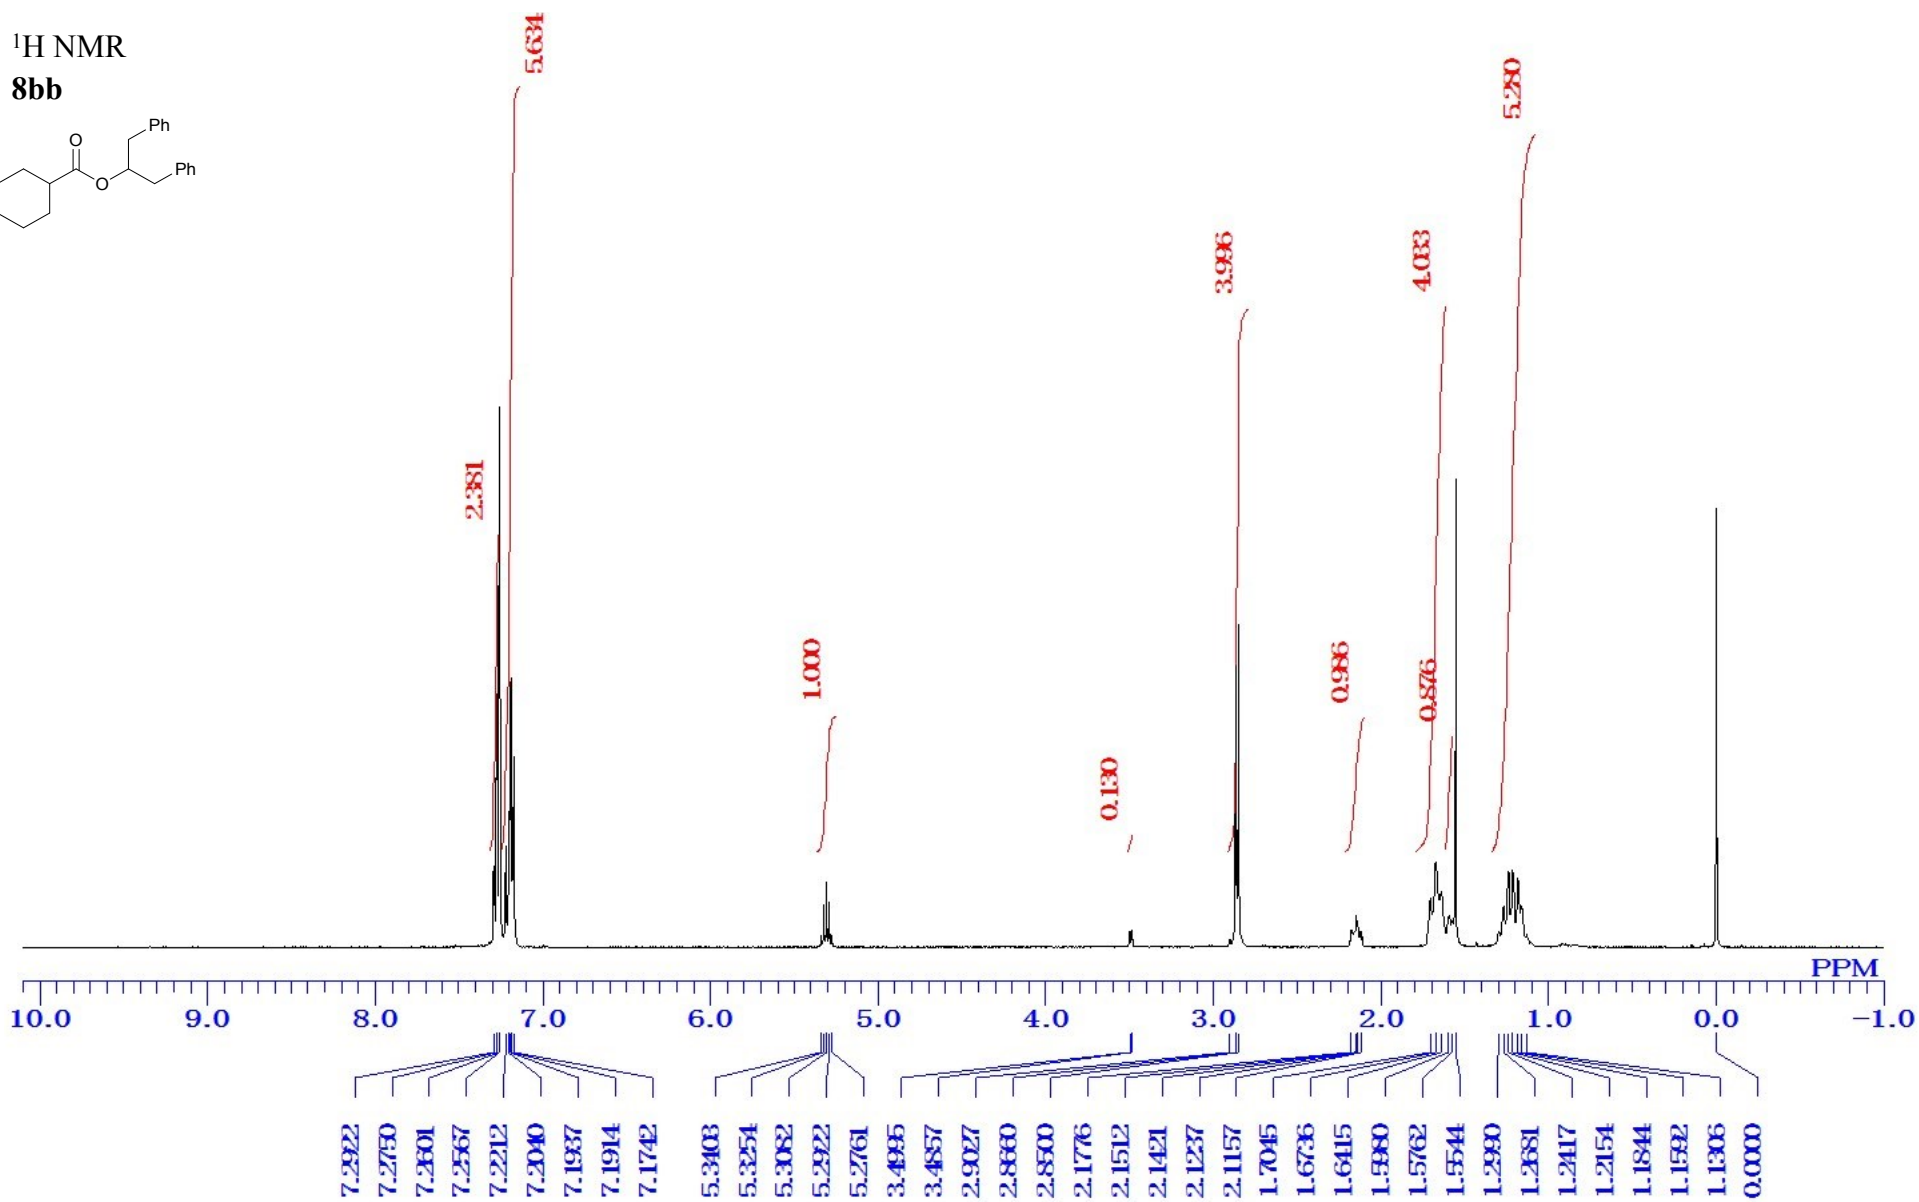

<sup>1</sup>H NMR

8ca

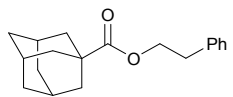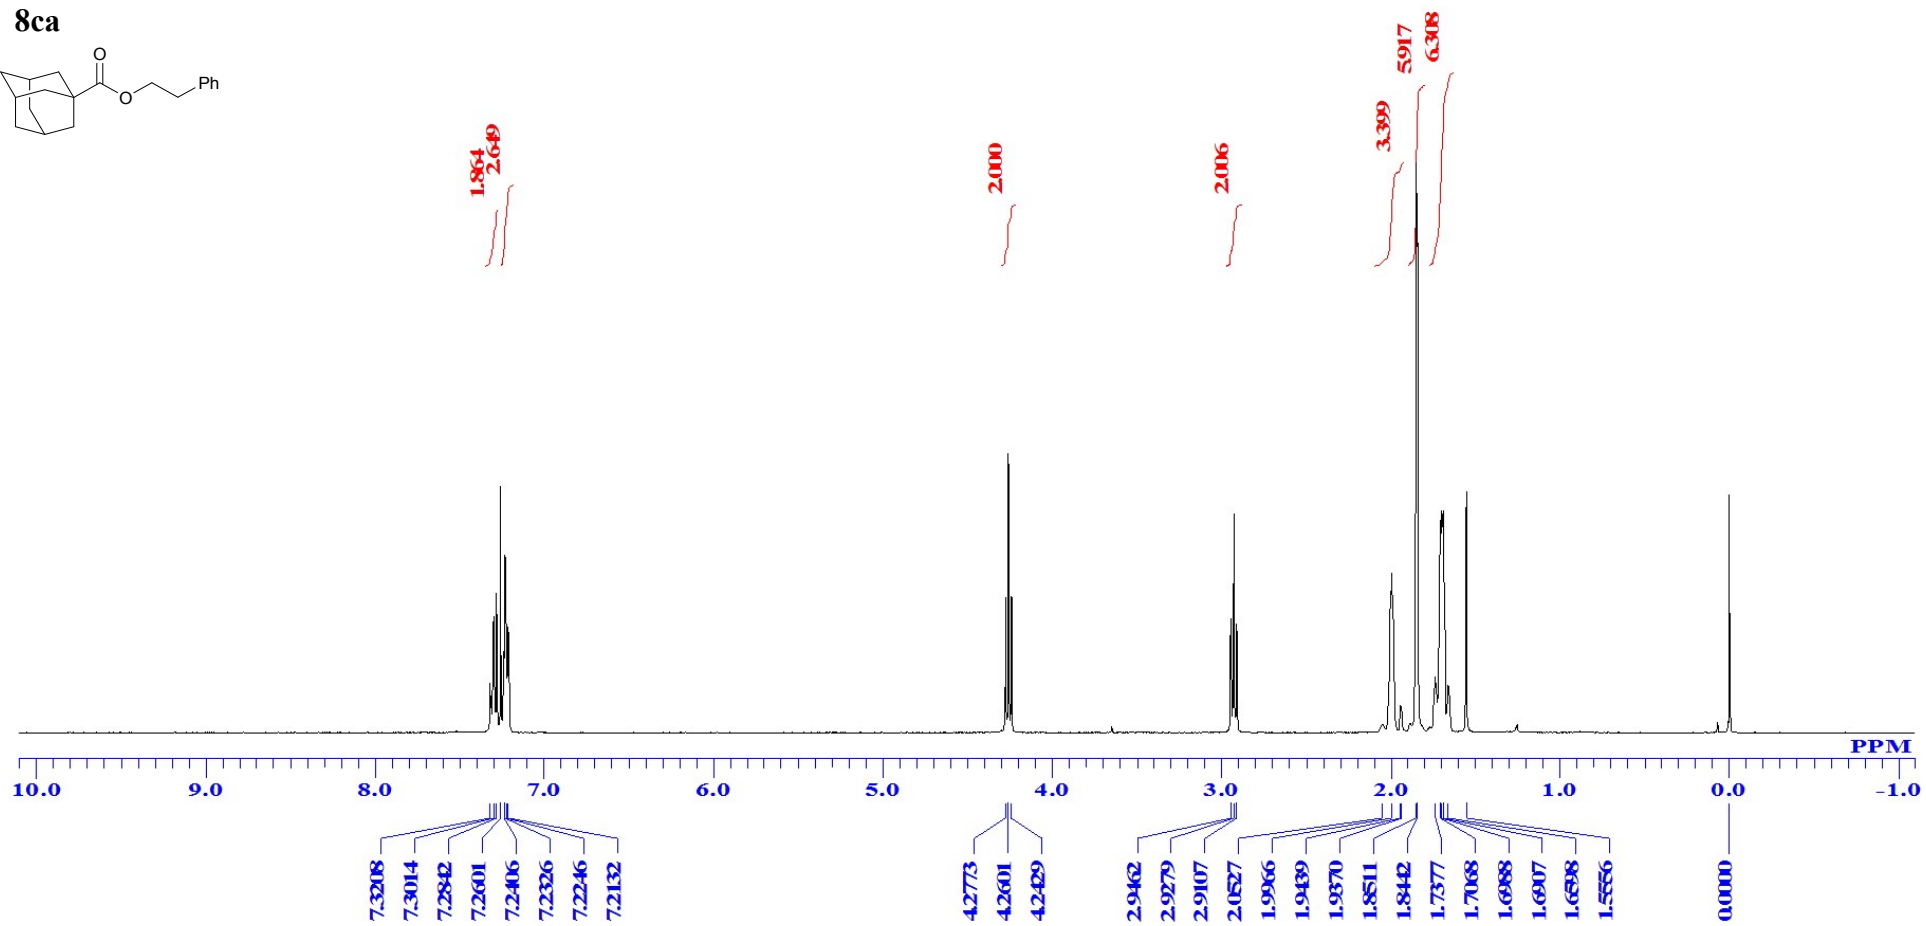

<sup>1</sup>H NMR

**8ac**

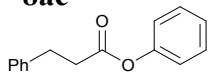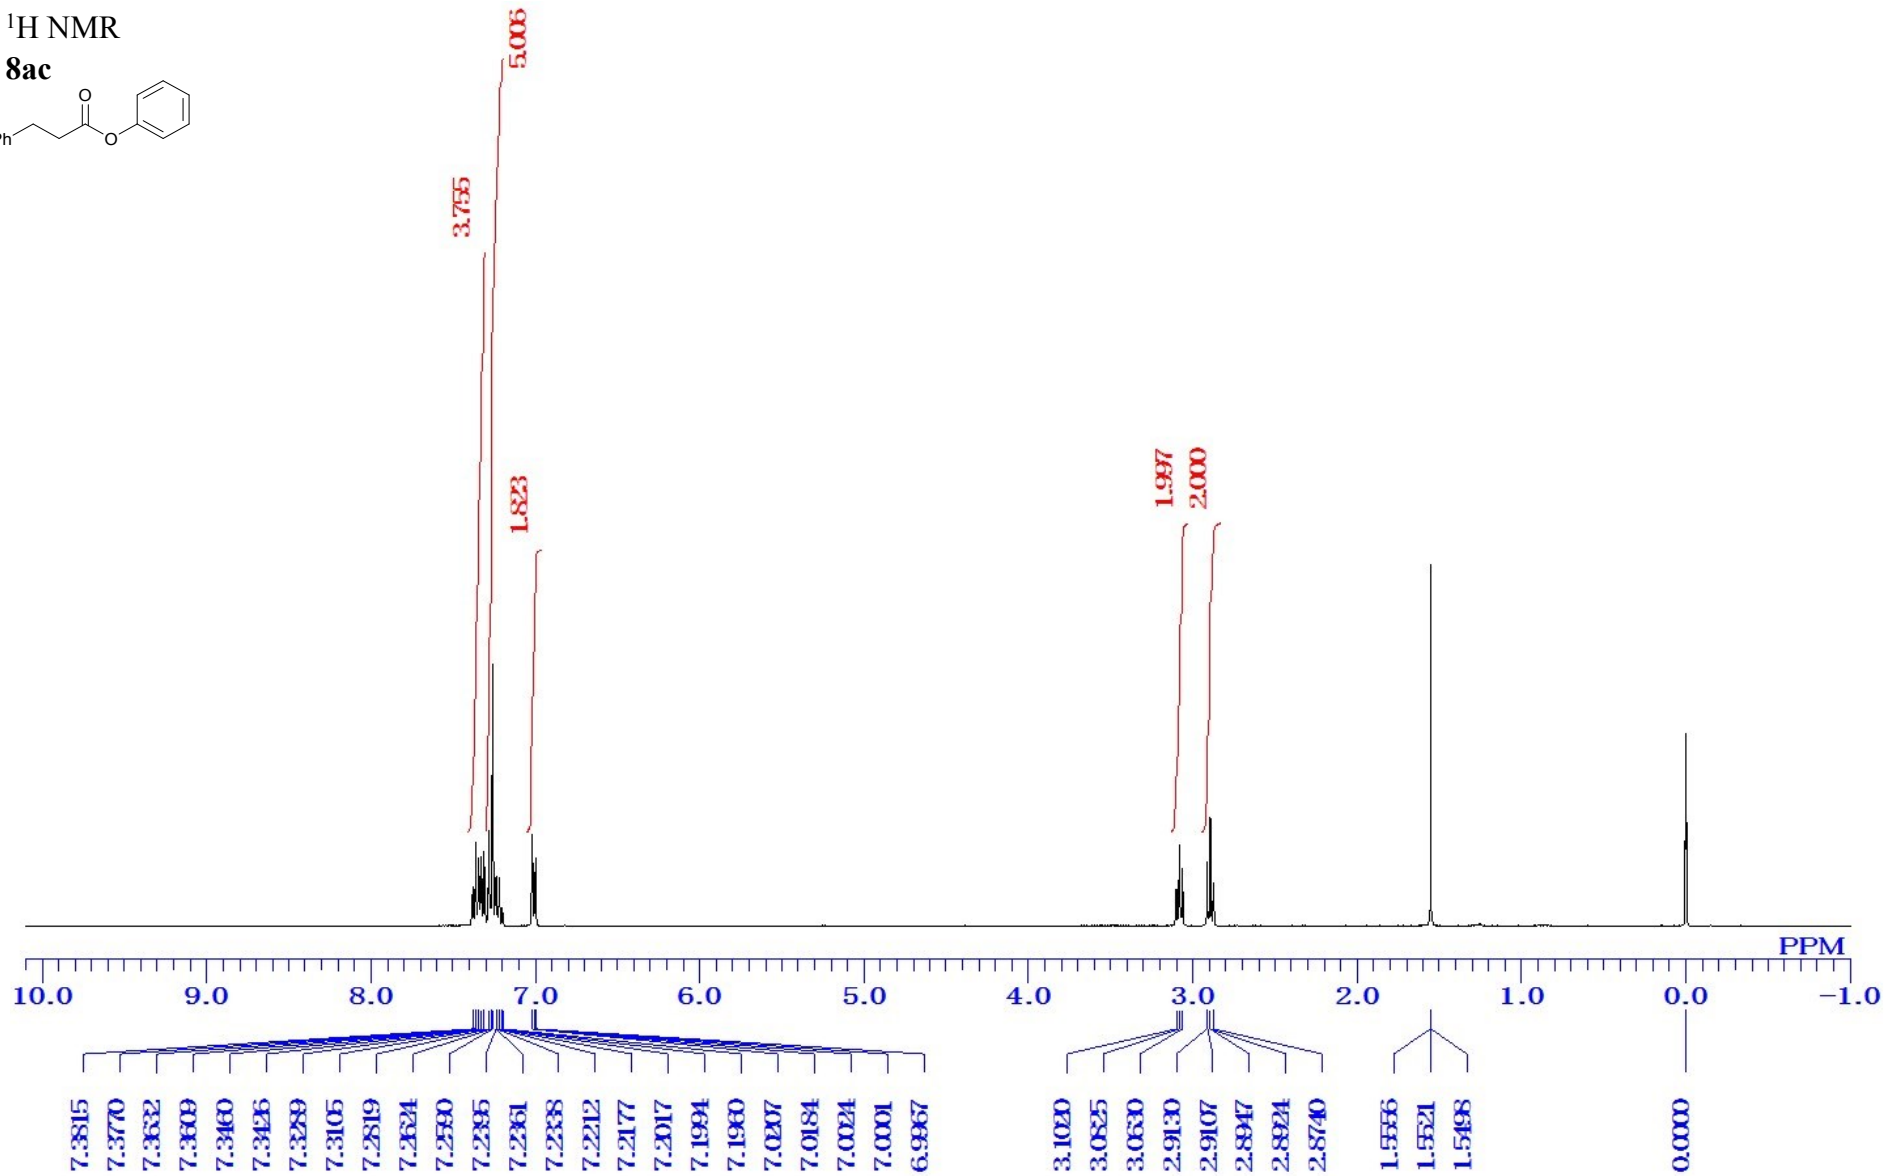



<sup>1</sup>H NMR

8da

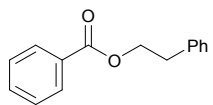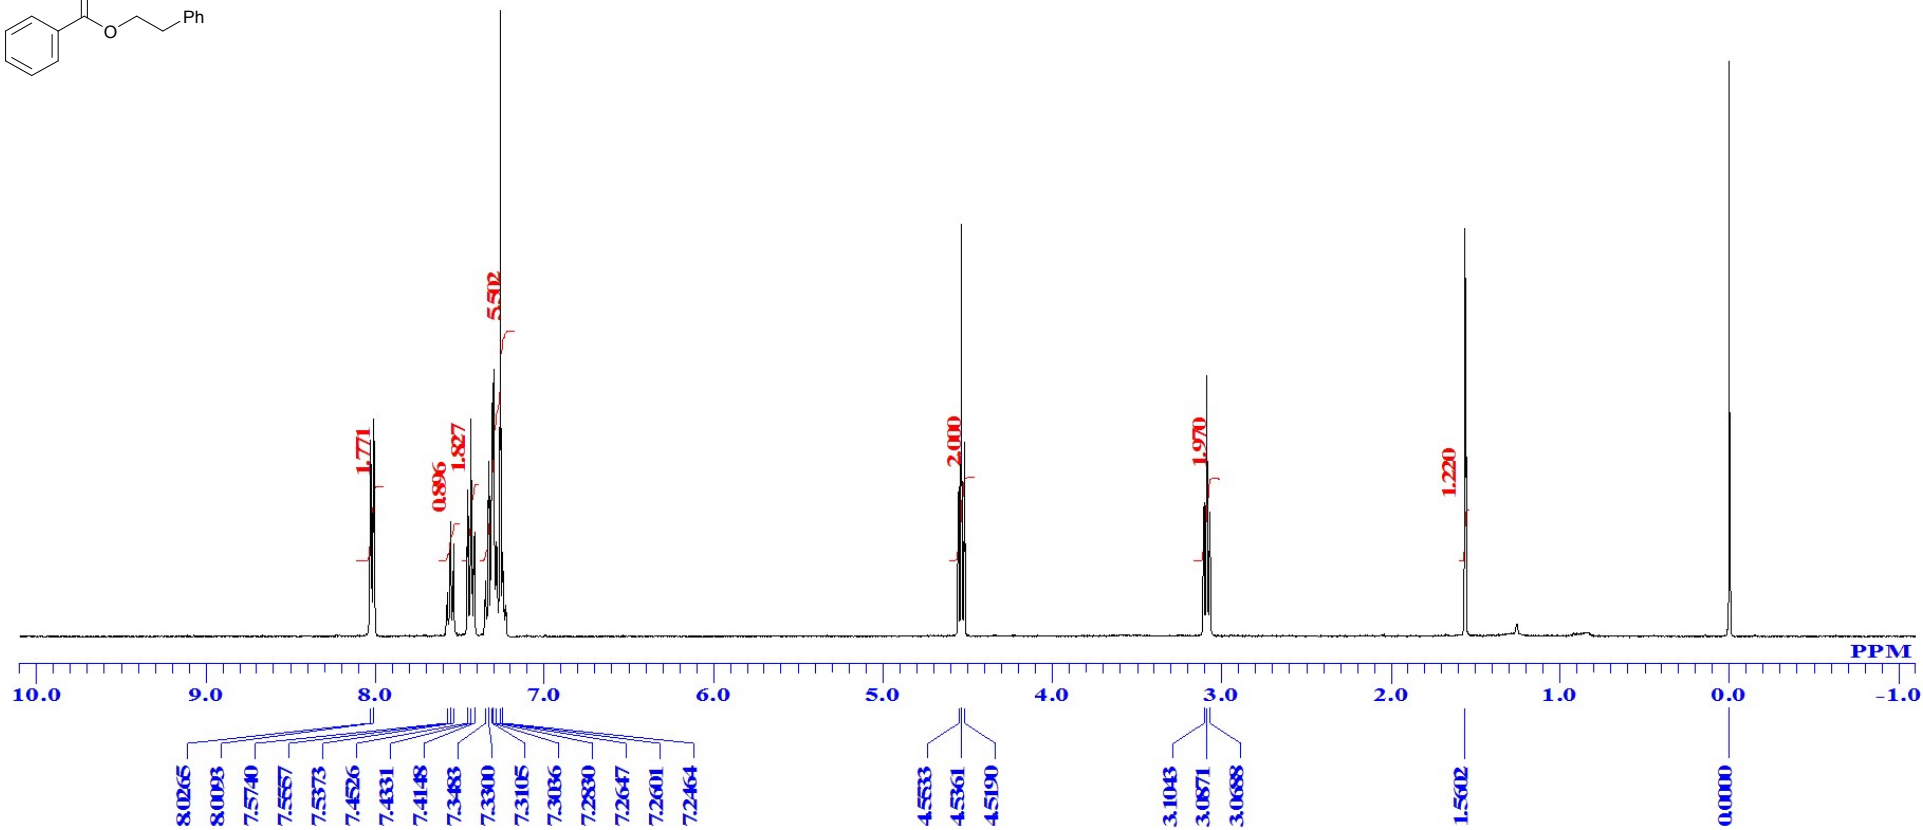

<sup>1</sup>H NMR

**8ed**

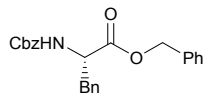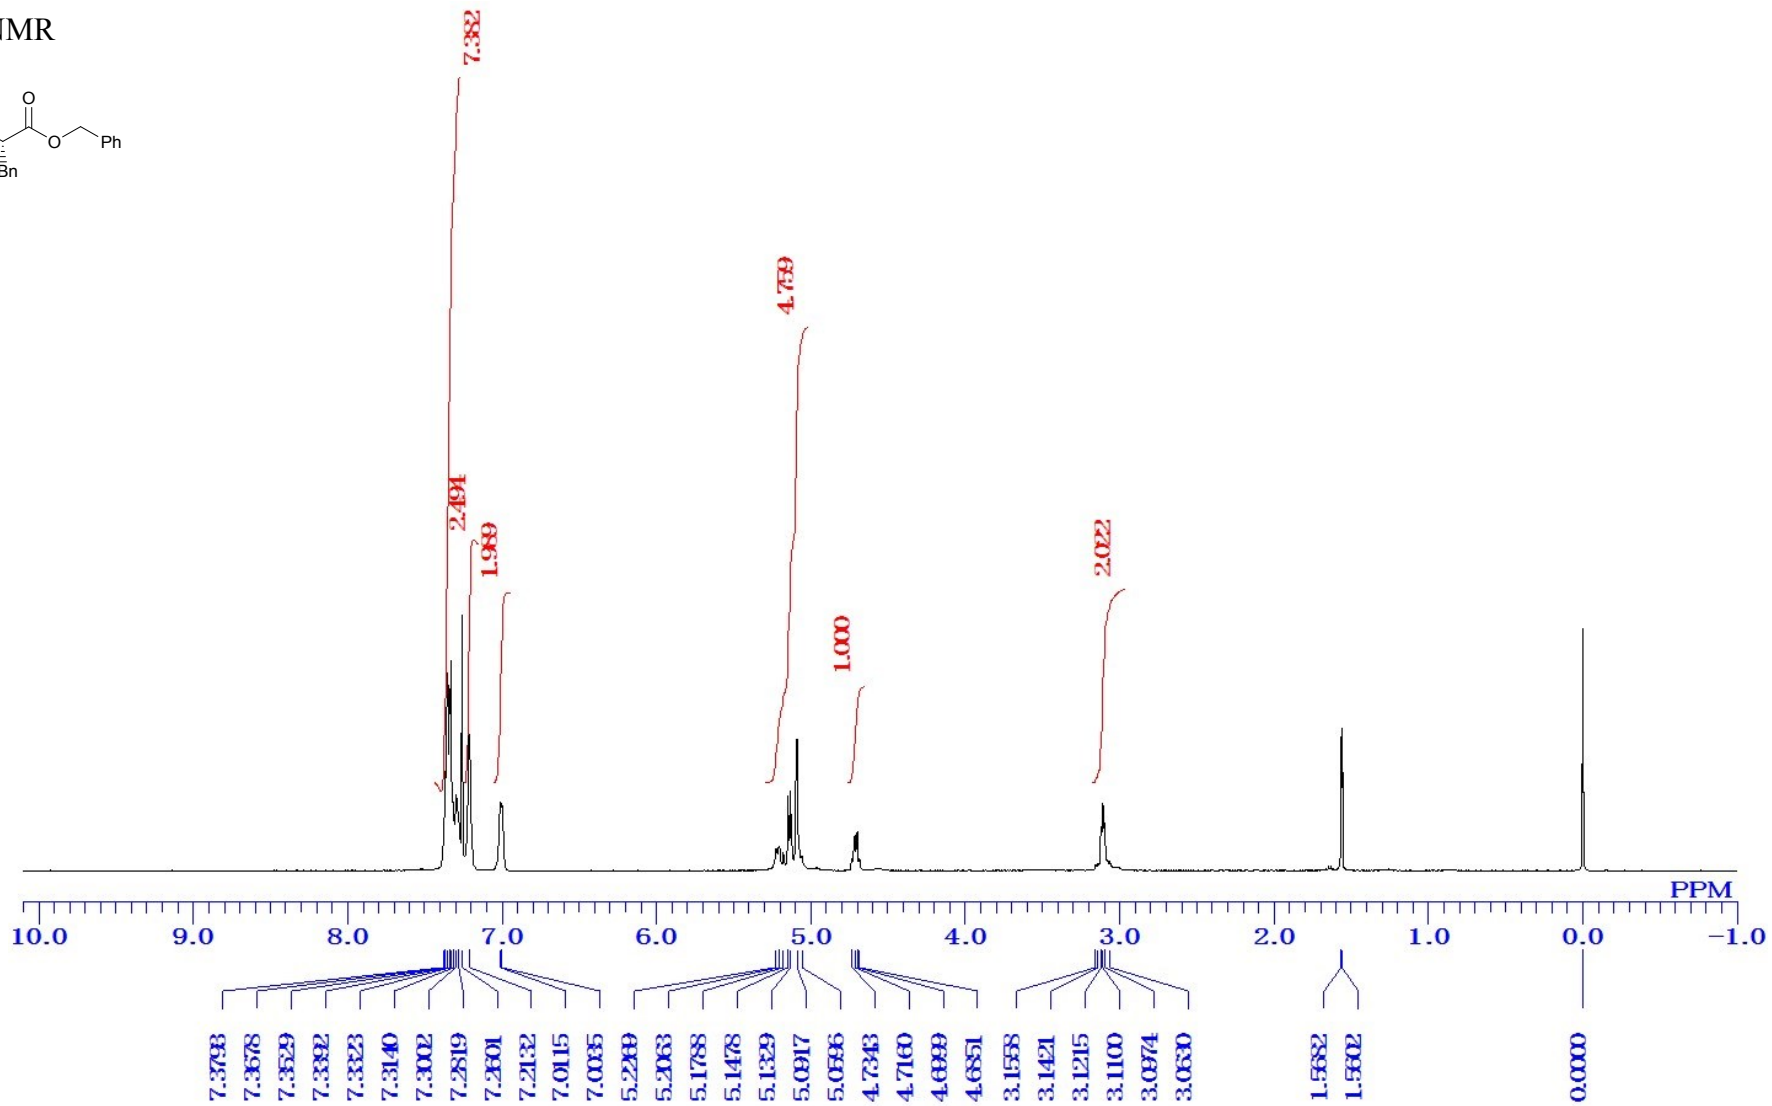

<sup>1</sup>H NMR  
8fe

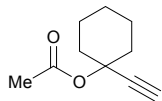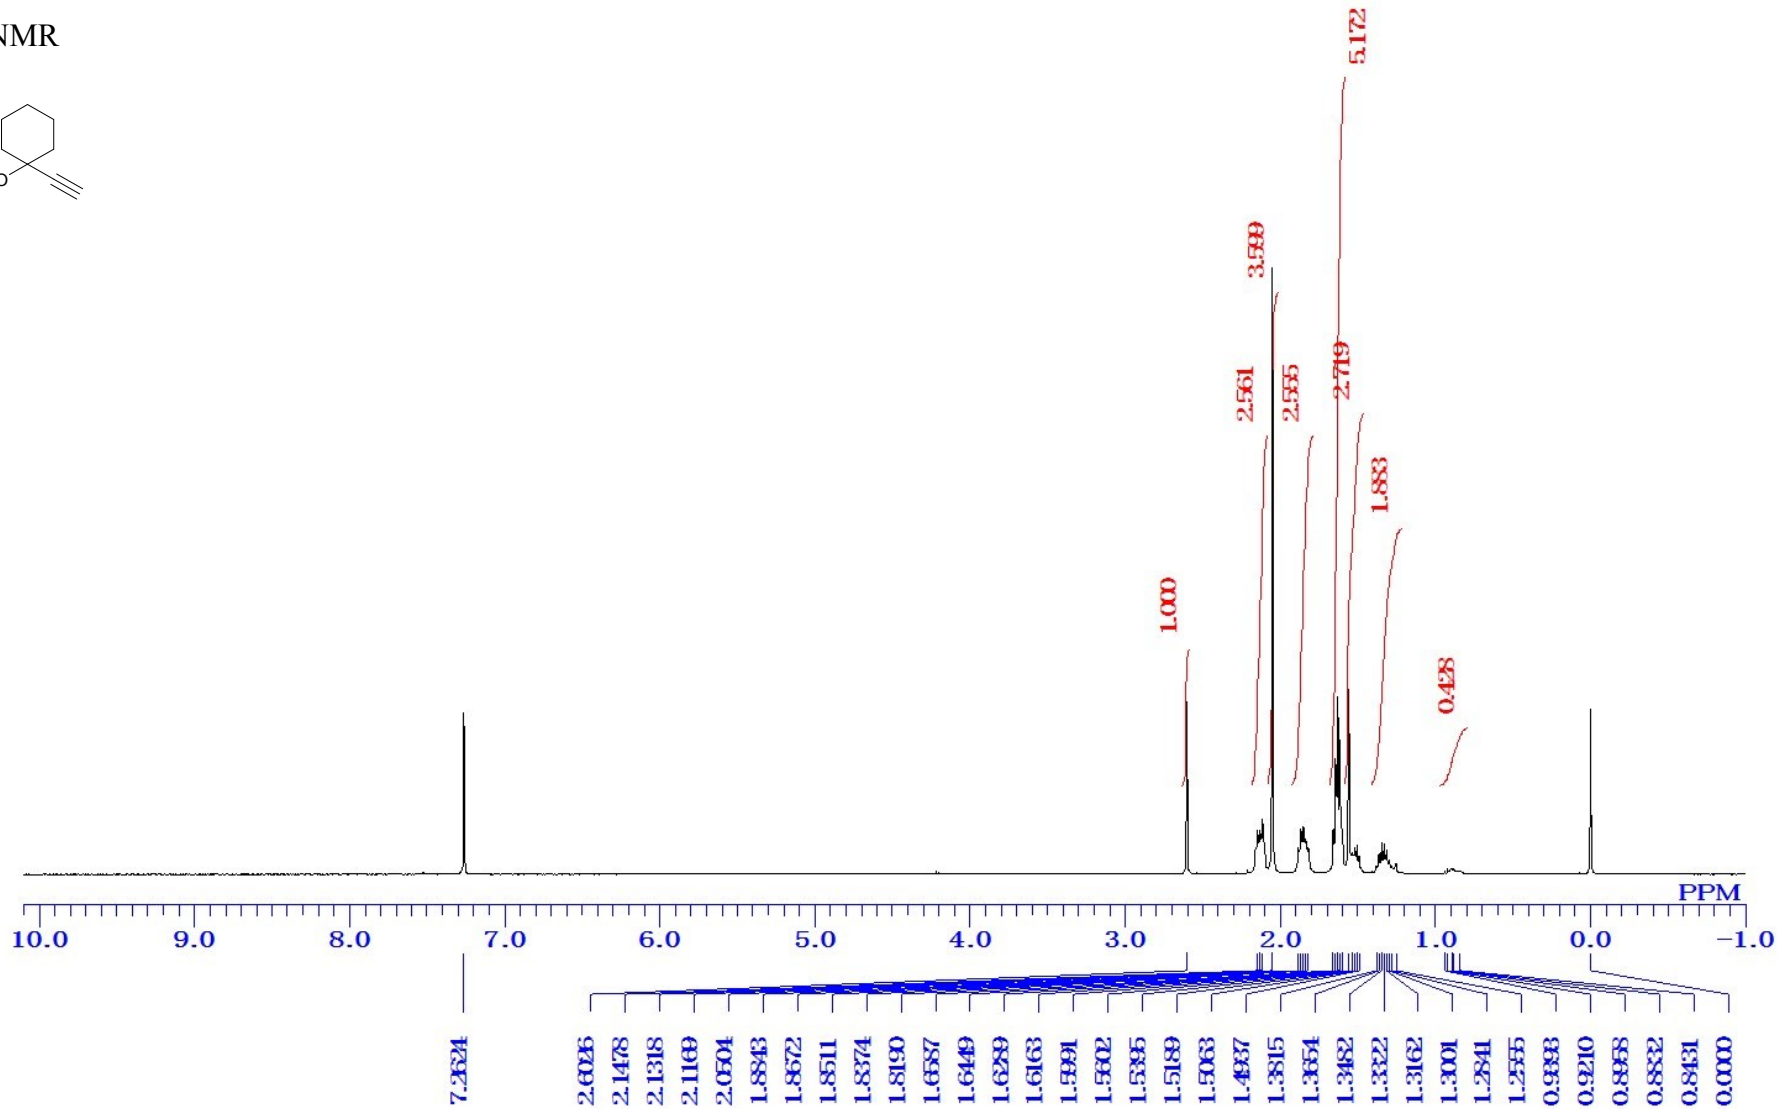

<sup>1</sup>H NMR

**10aa**

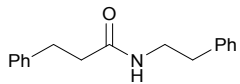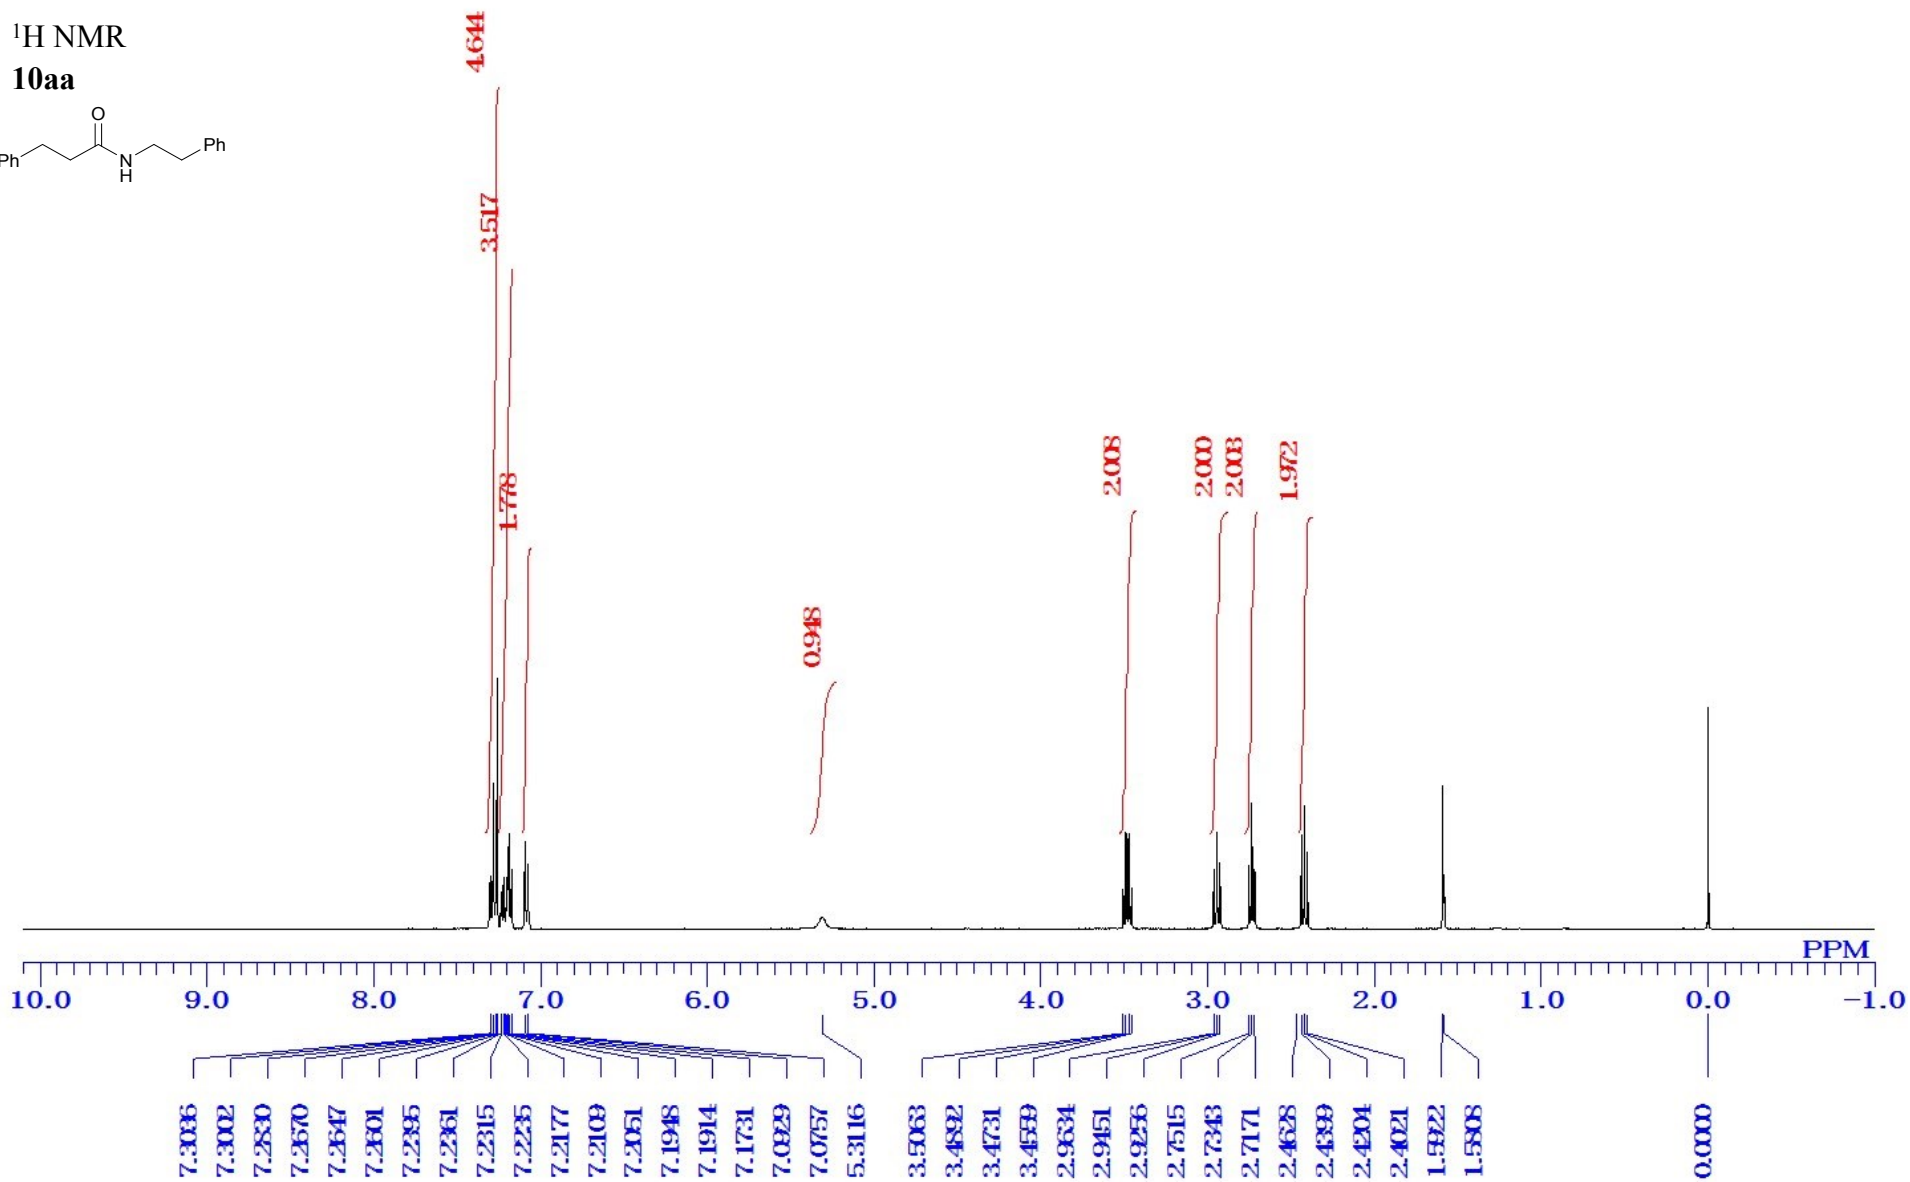

<sup>1</sup>H NMR  
10ha

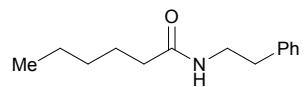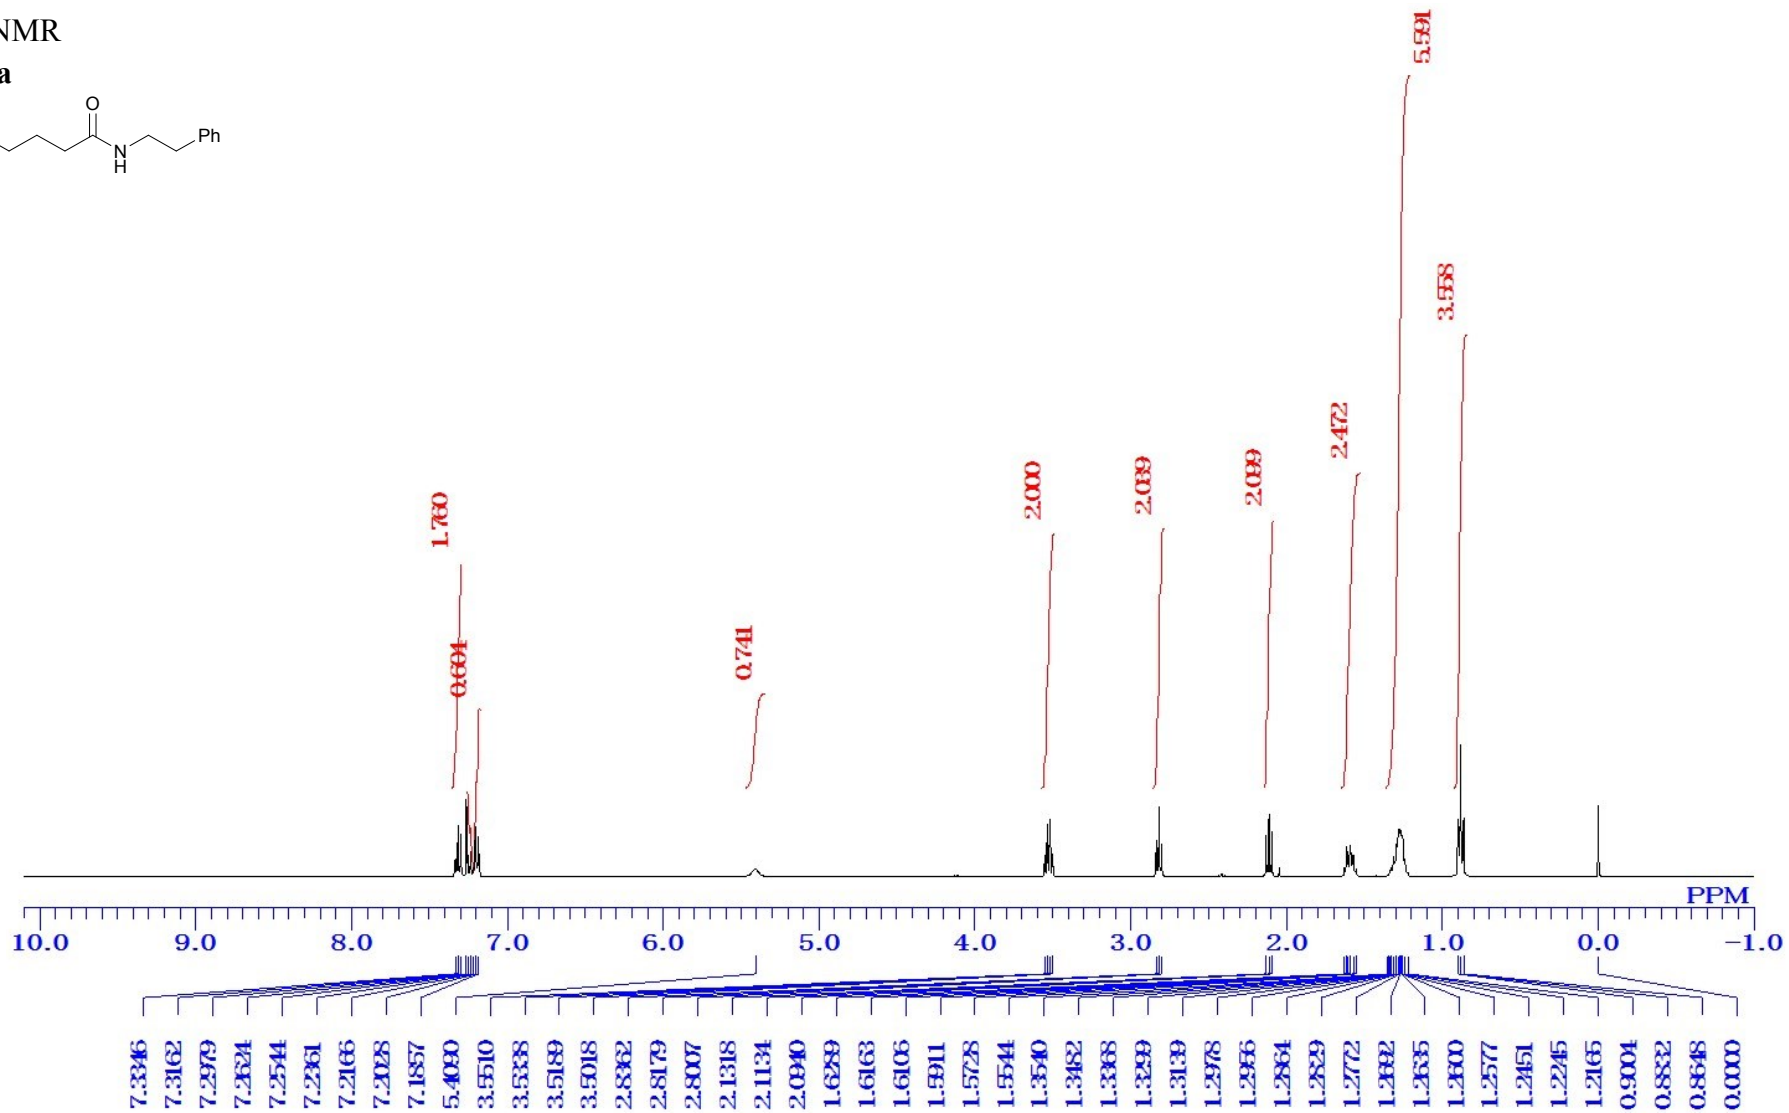

<sup>1</sup>H NMR  
10ia

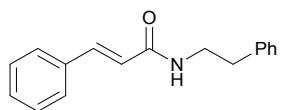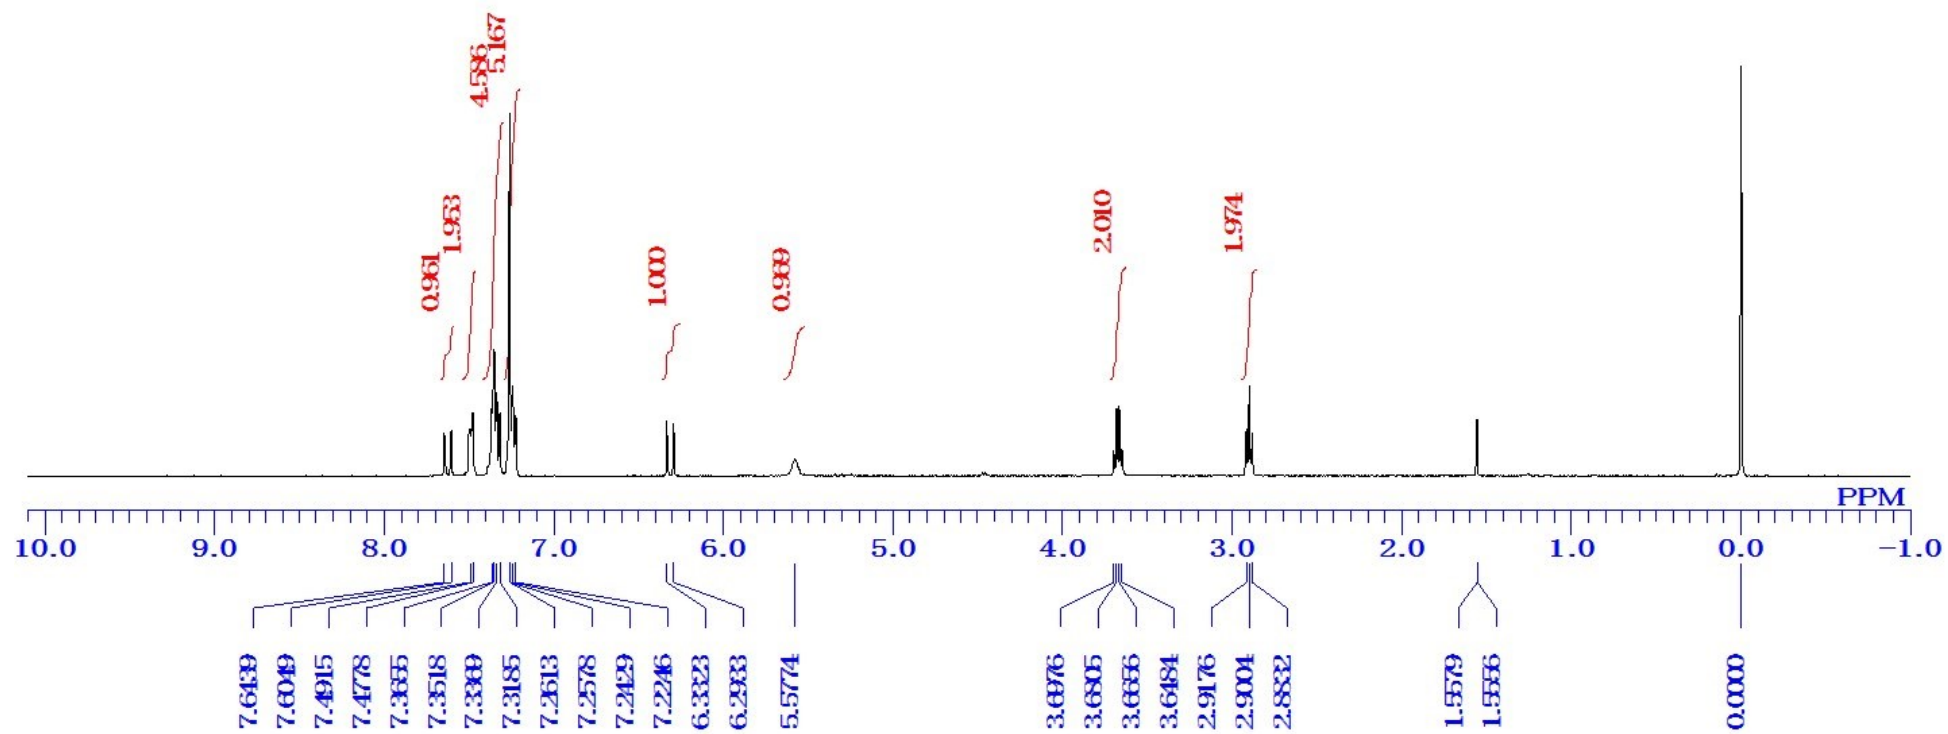

<sup>1</sup>H NMR  
10ja

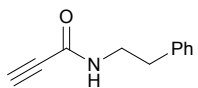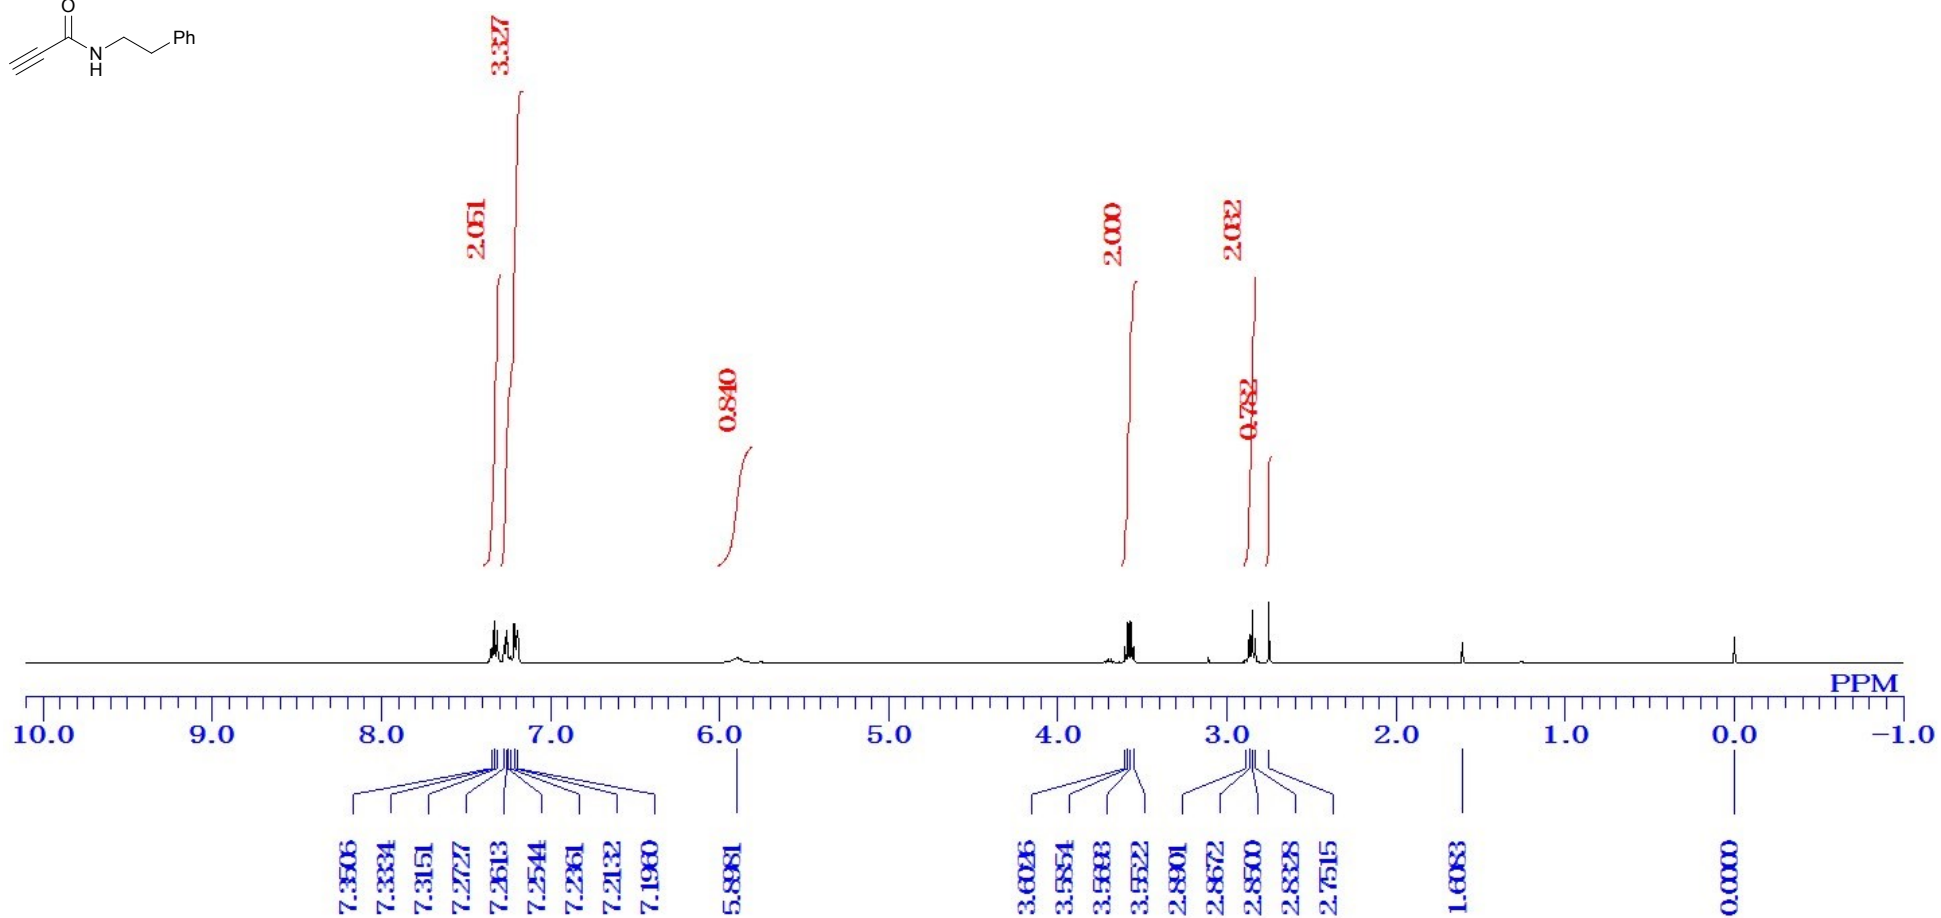

<sup>1</sup>H NMR  
10ka

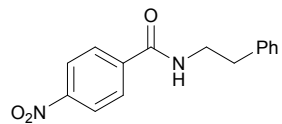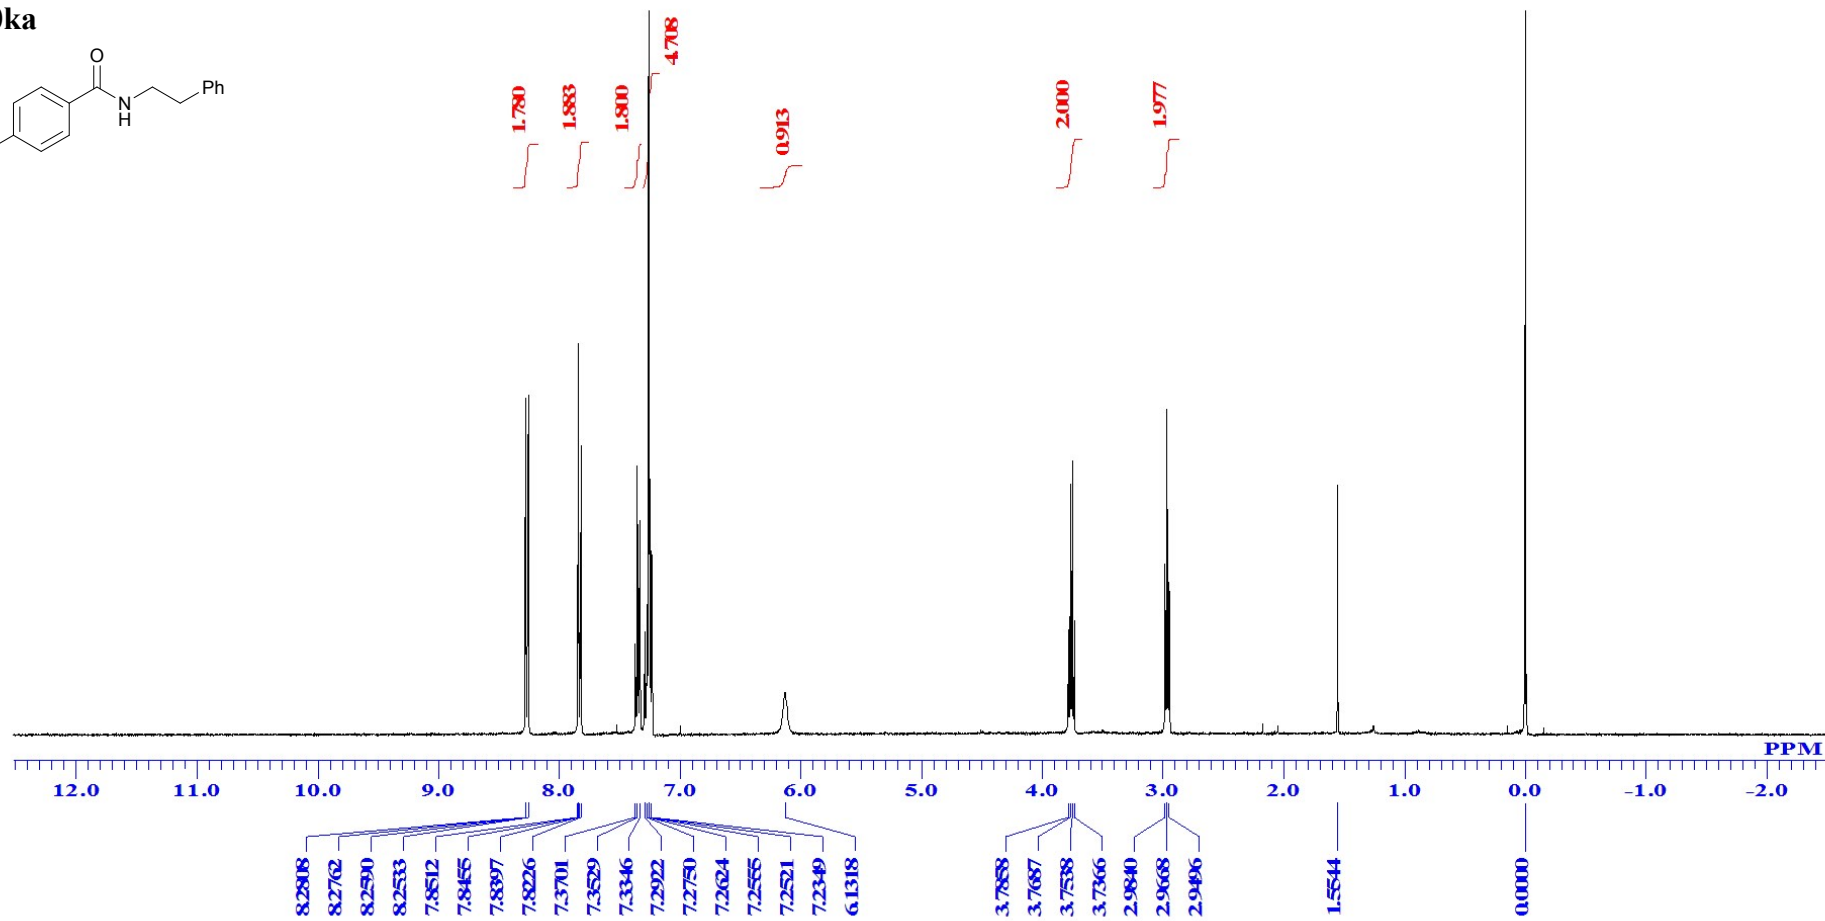



<sup>1</sup>H NMR

**10a**

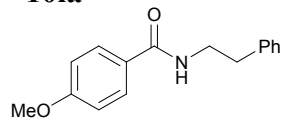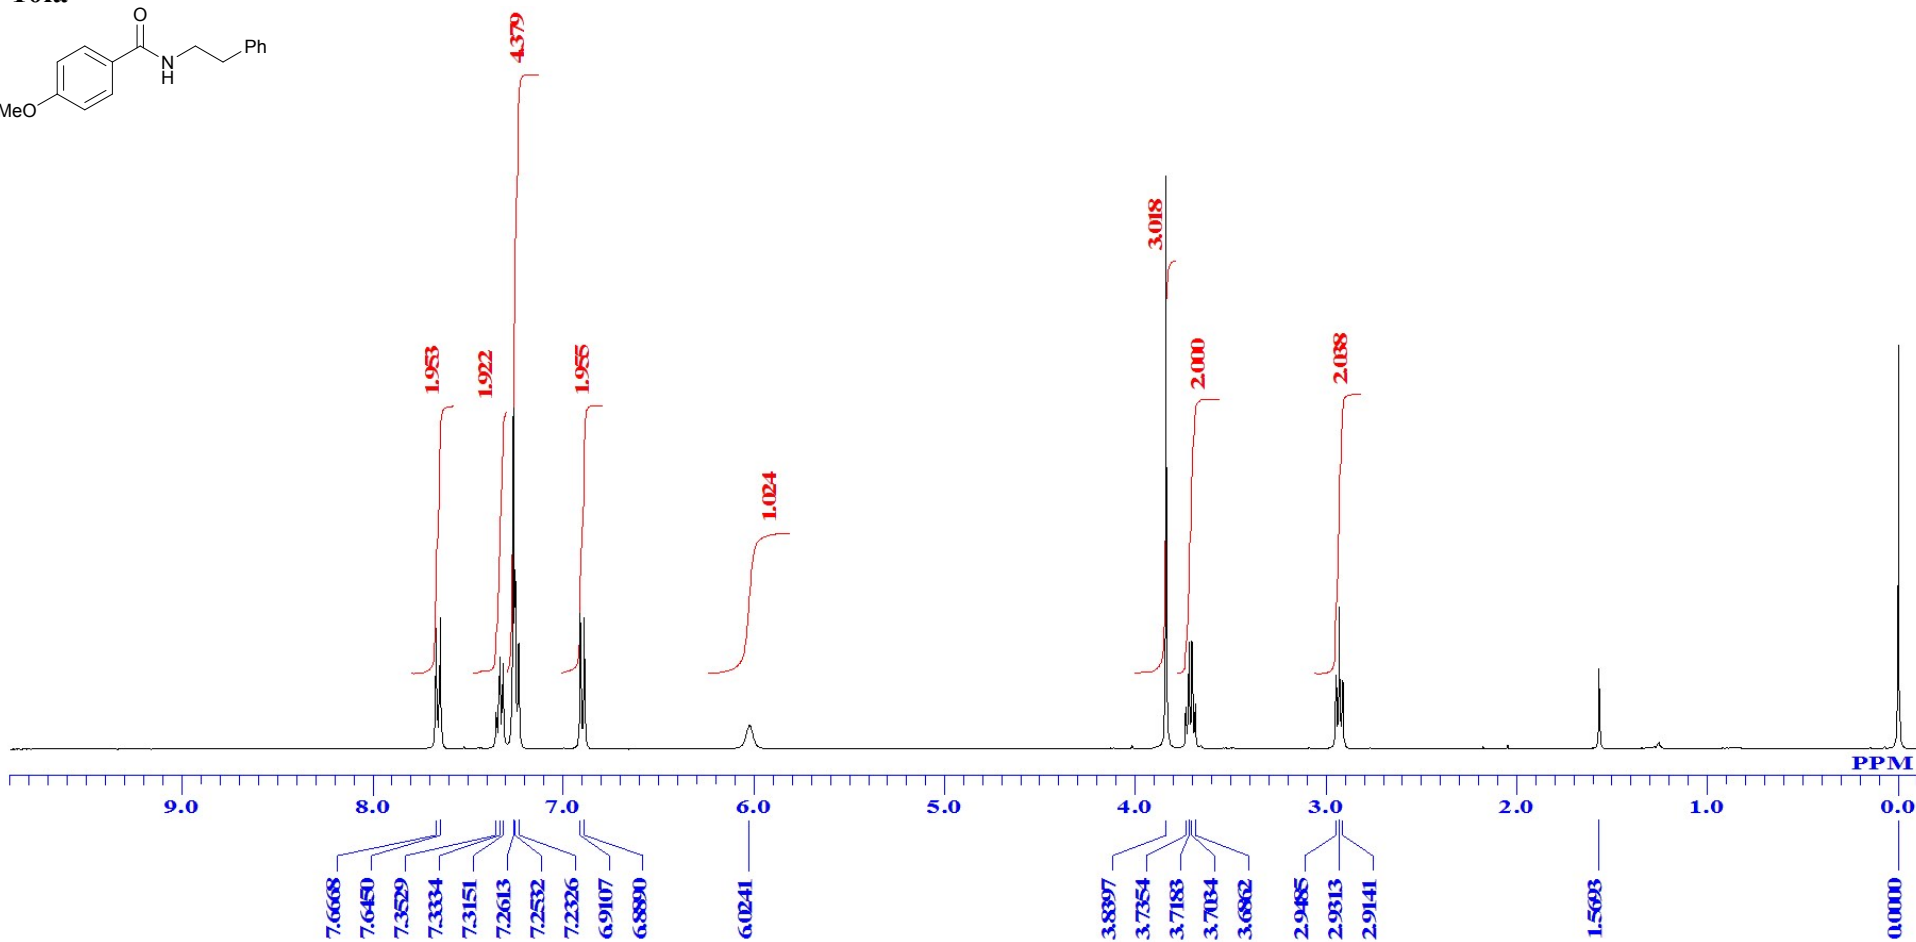

<sup>1</sup>H NMR

**10ma**

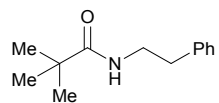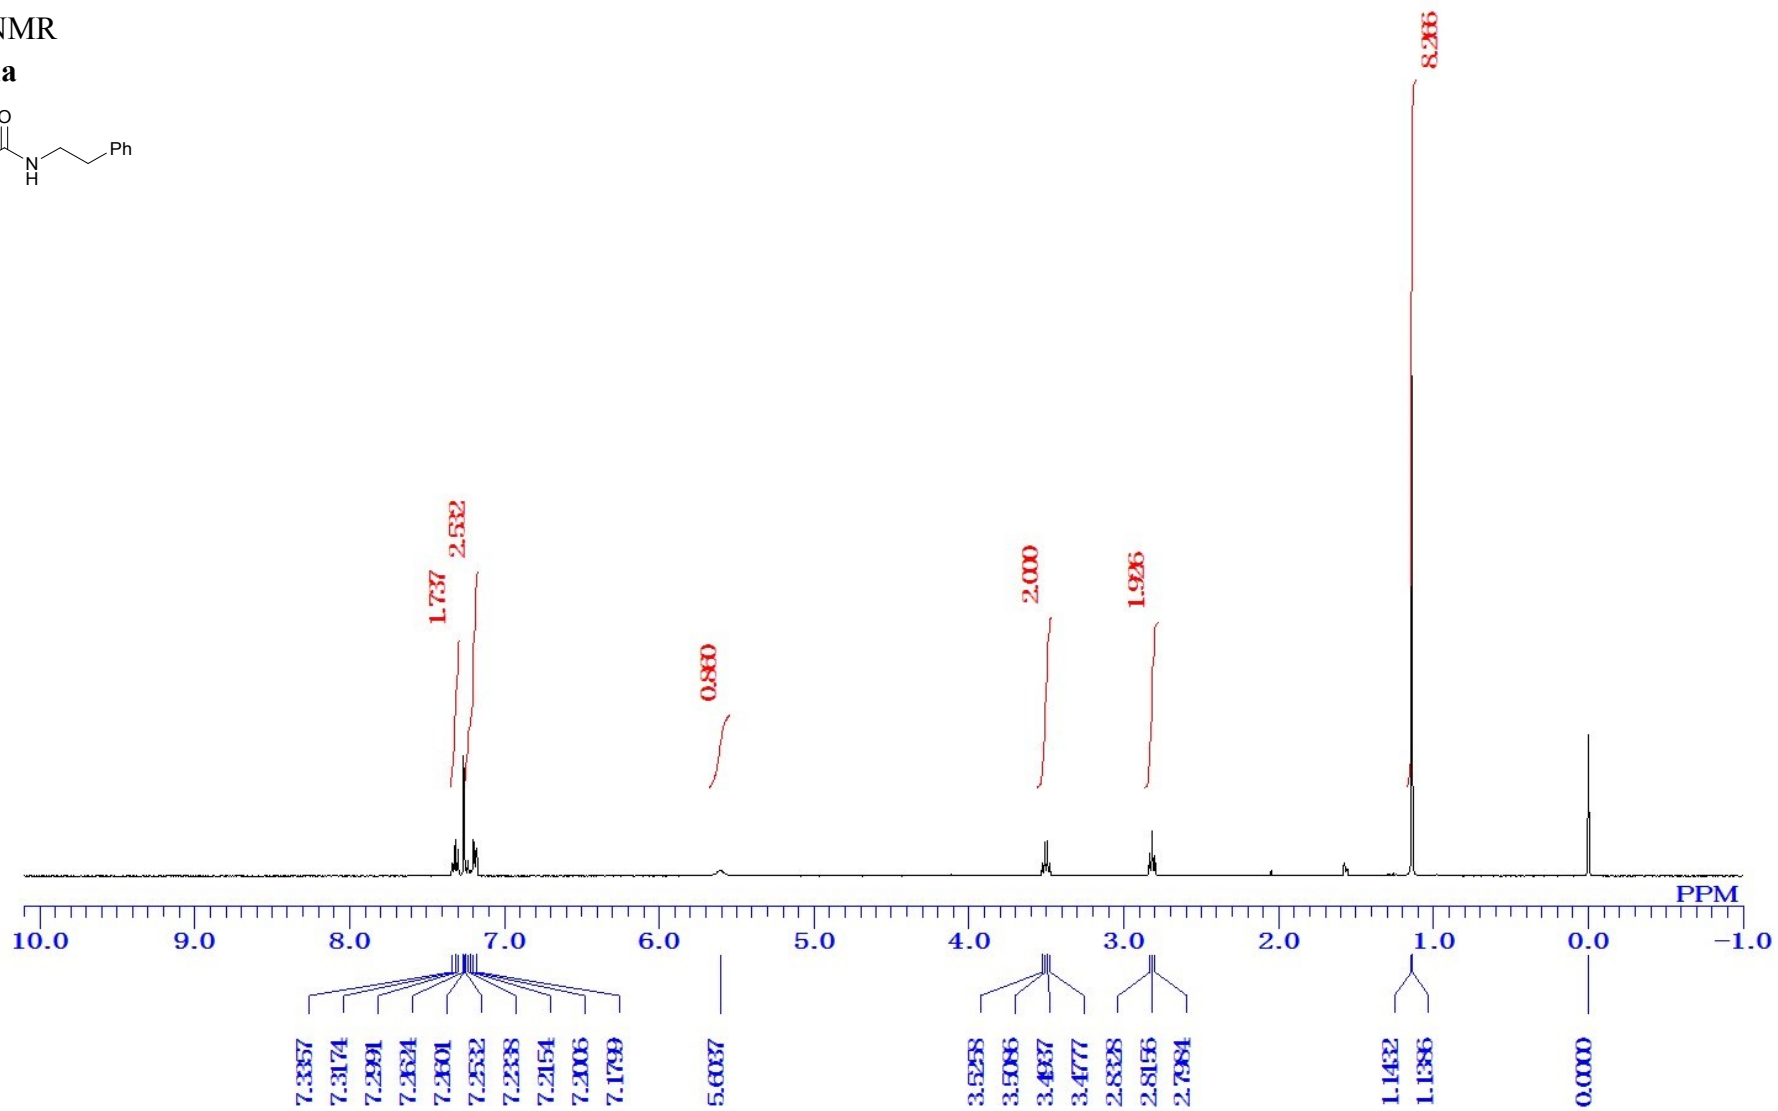

<sup>1</sup>H NMR

**10ab**

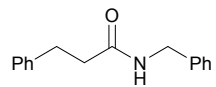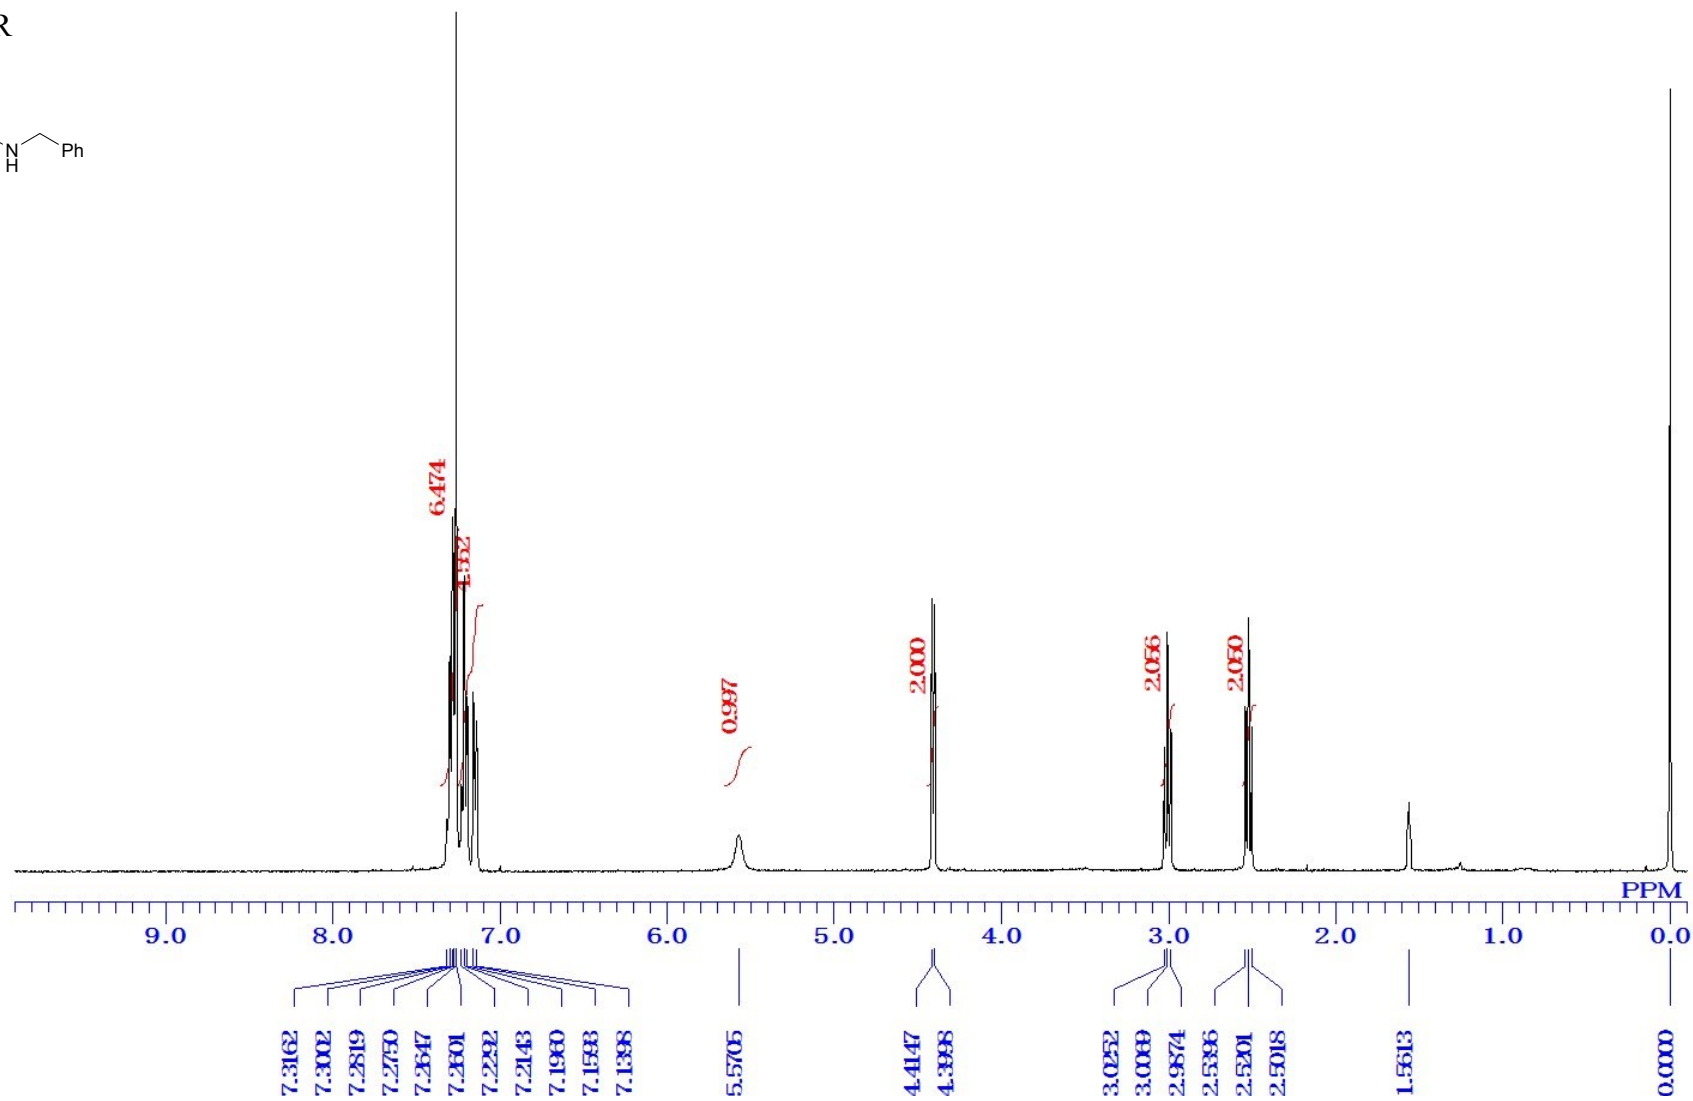

<sup>1</sup>H NMR  
10ac

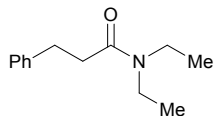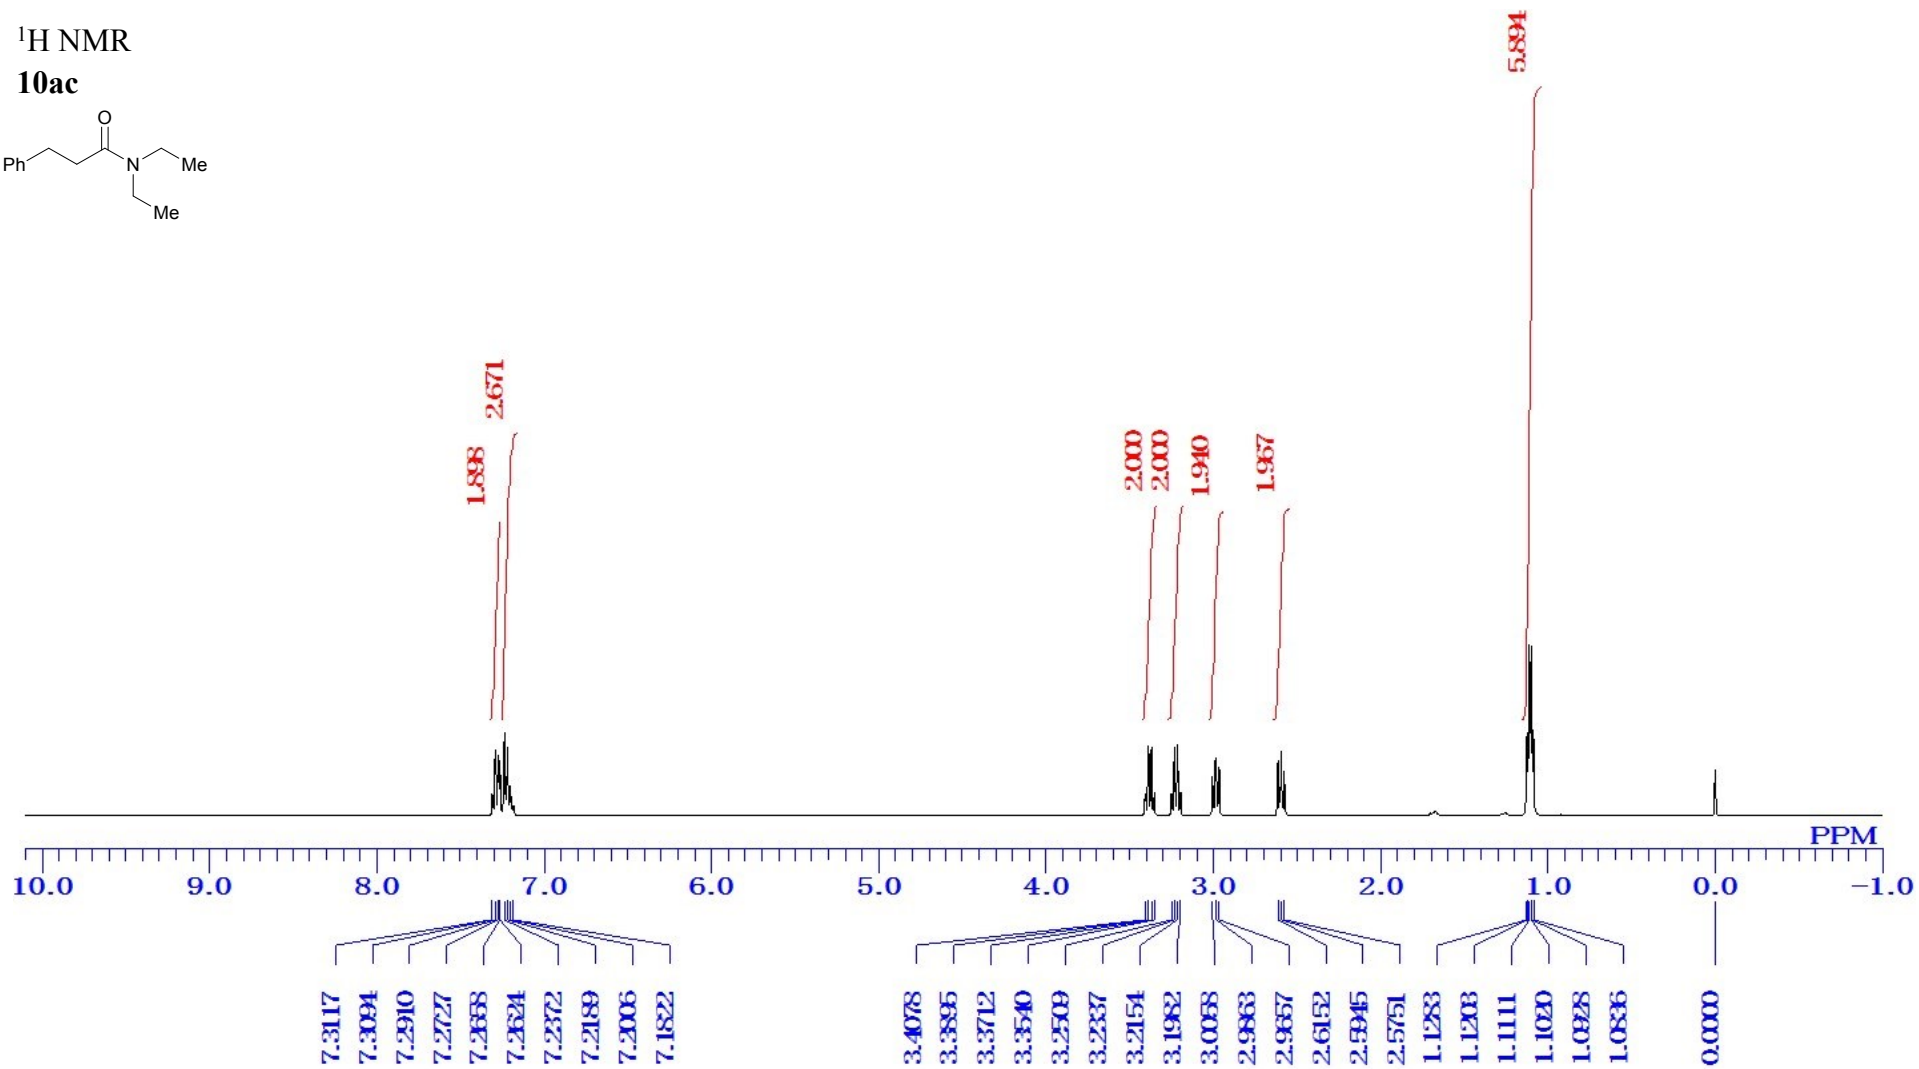

<sup>1</sup>H NMR

**10dd**

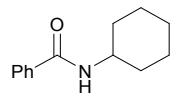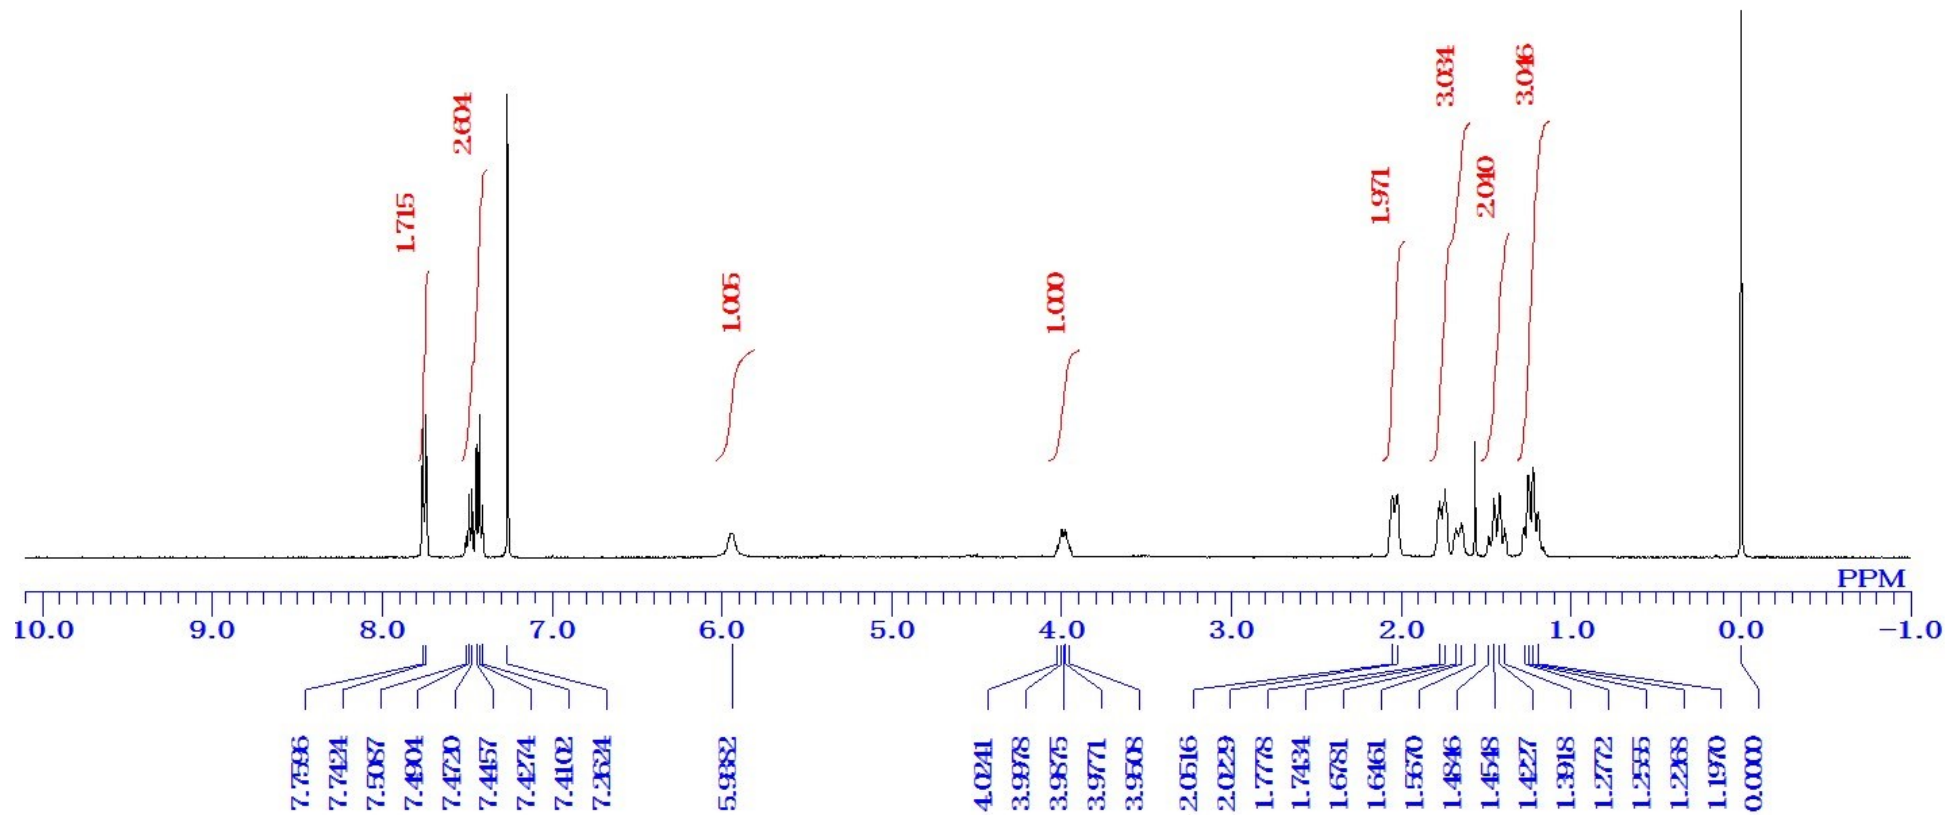

<sup>1</sup>H NMR

**10ae**

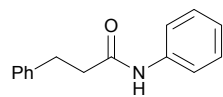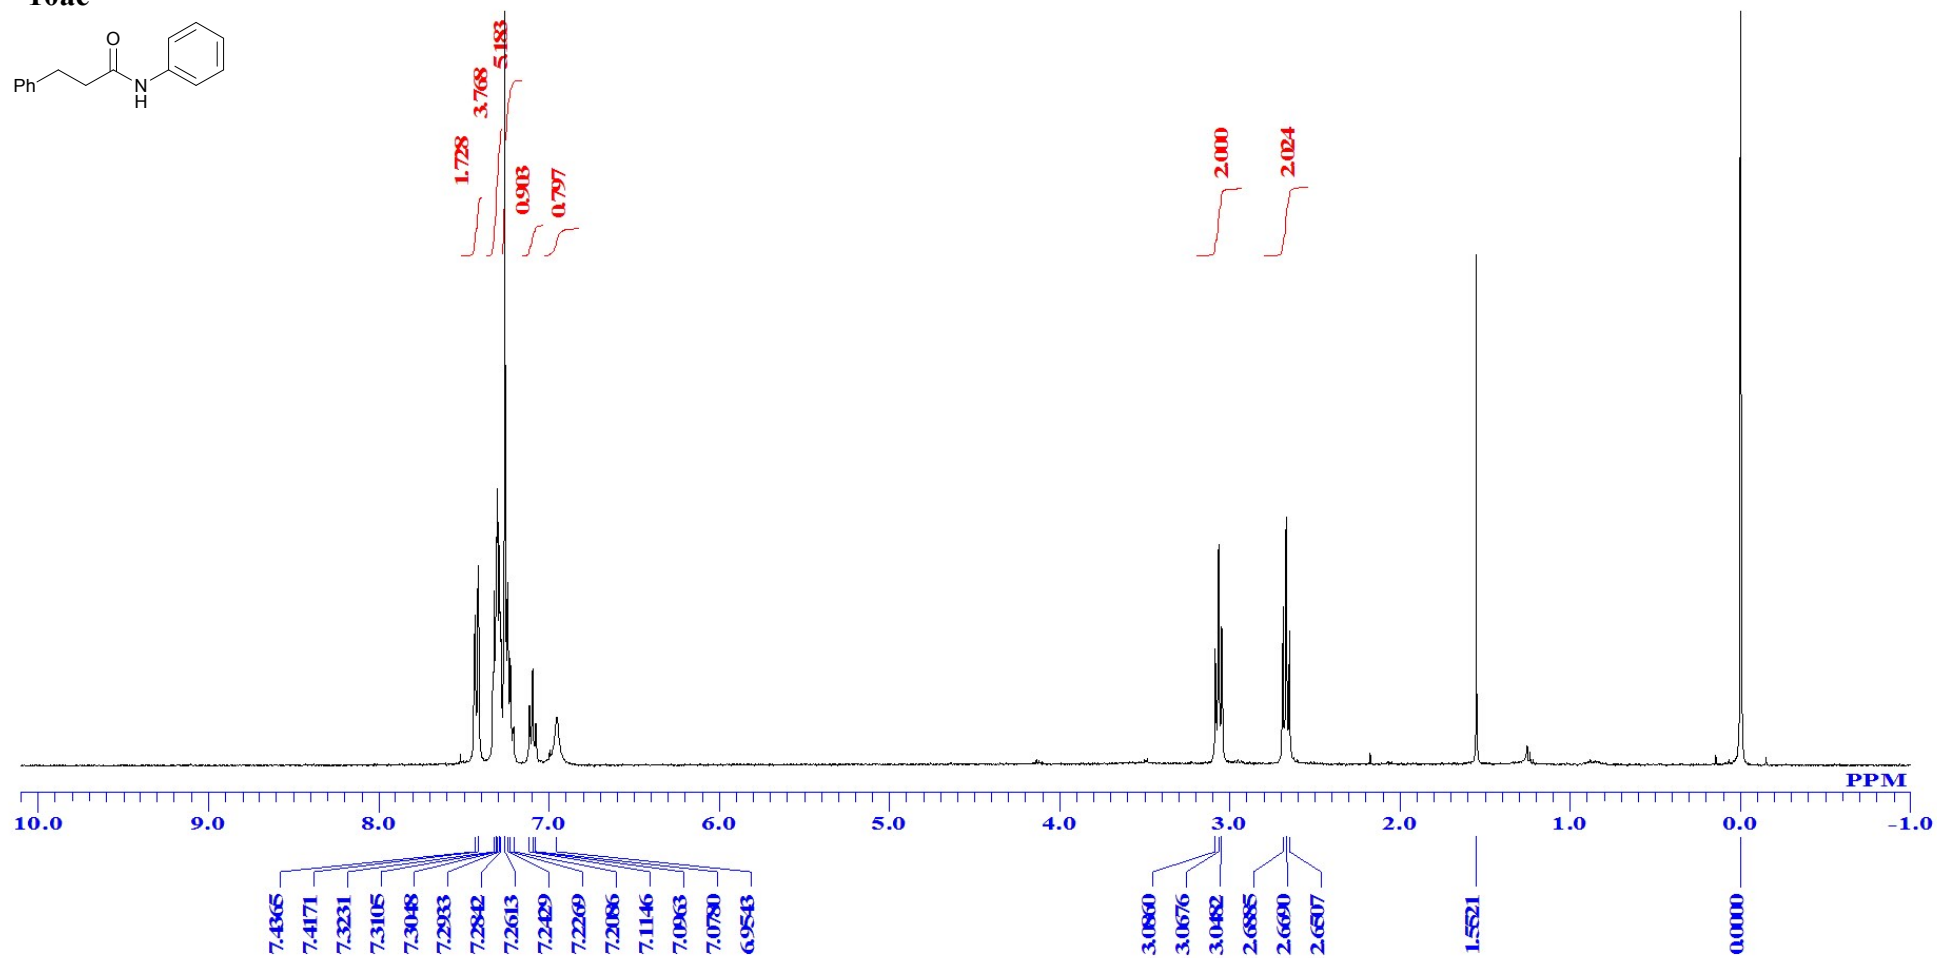

<sup>1</sup>H NMR

**10nf**

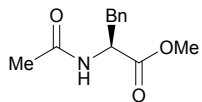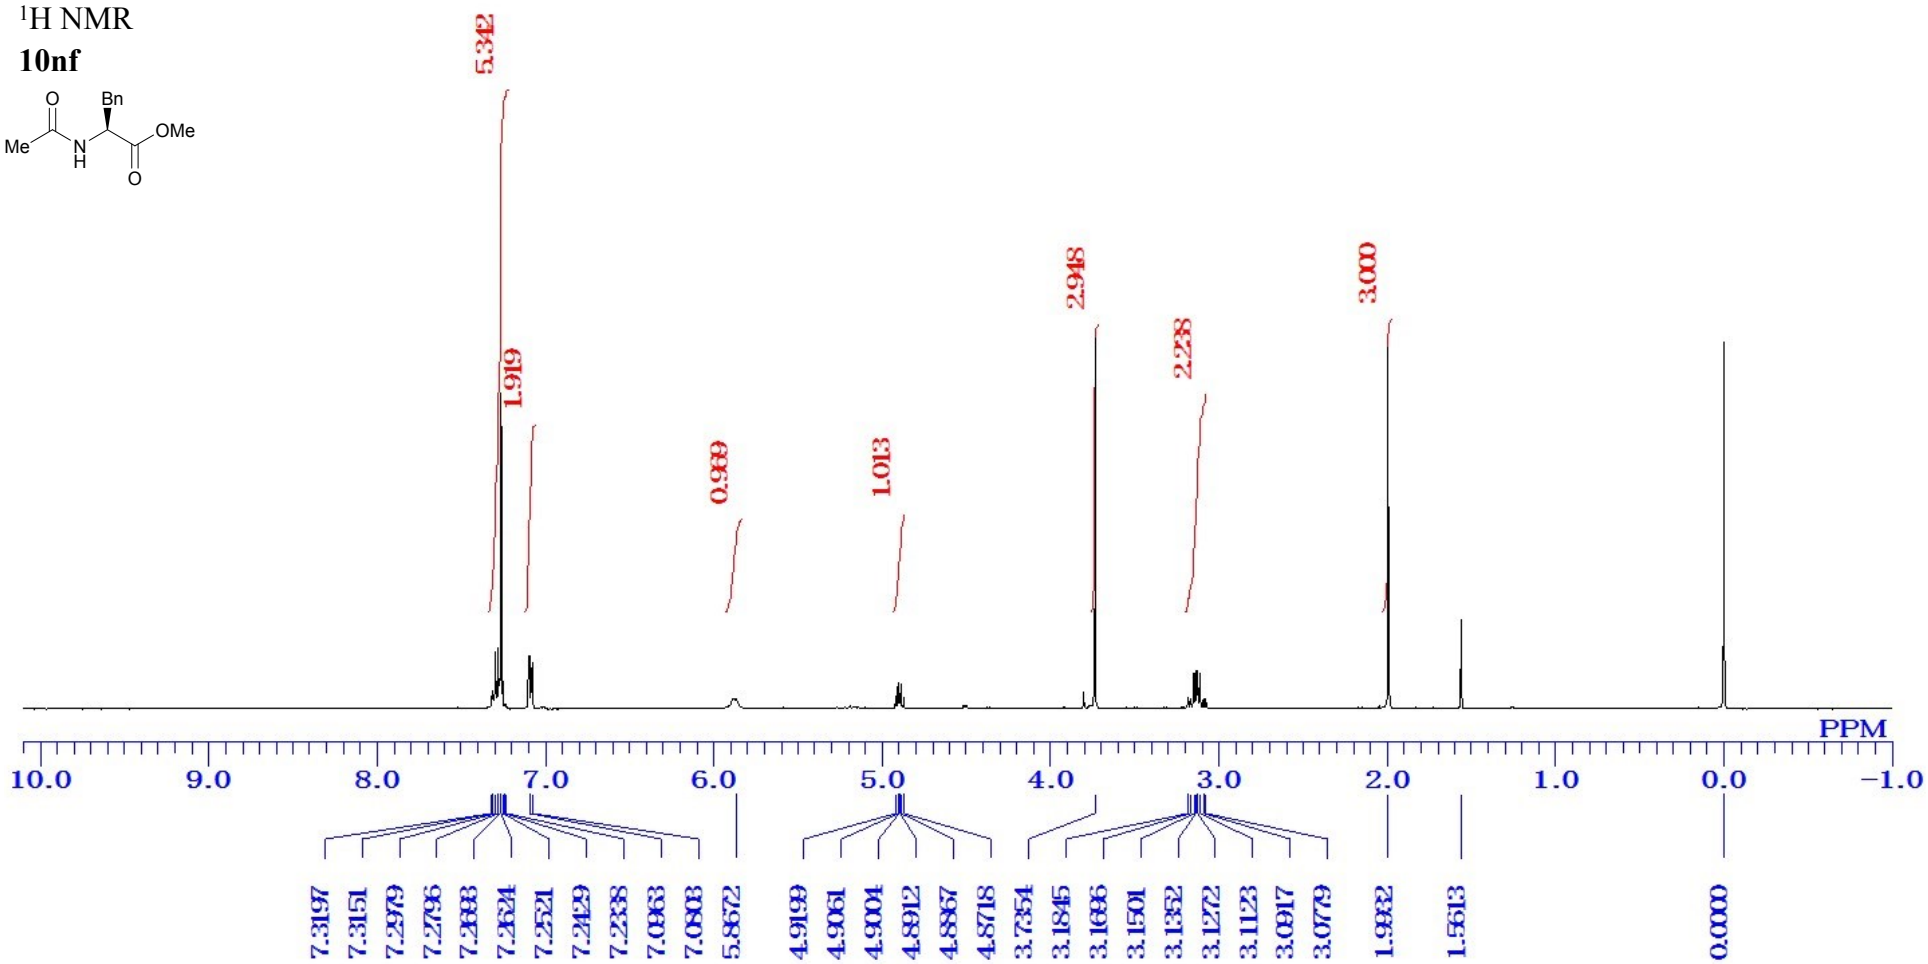

<sup>1</sup>H NMR  
10eg

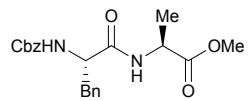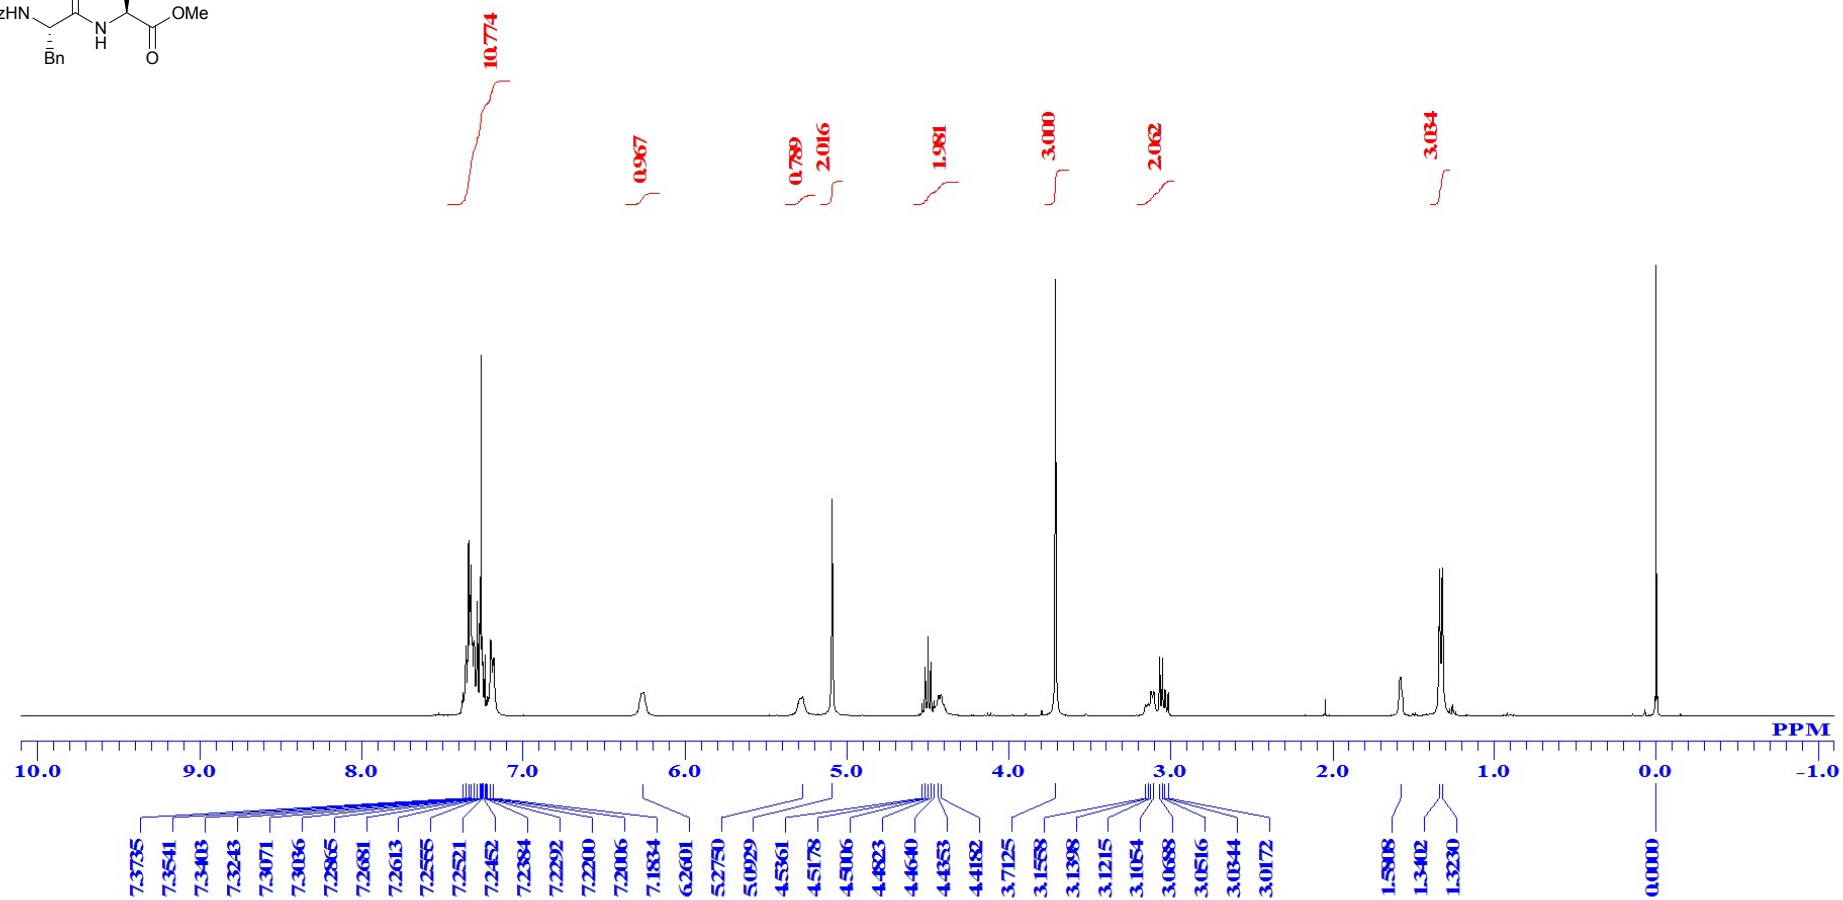





<sup>13</sup>C NMR

**12**

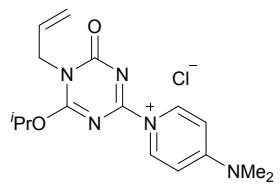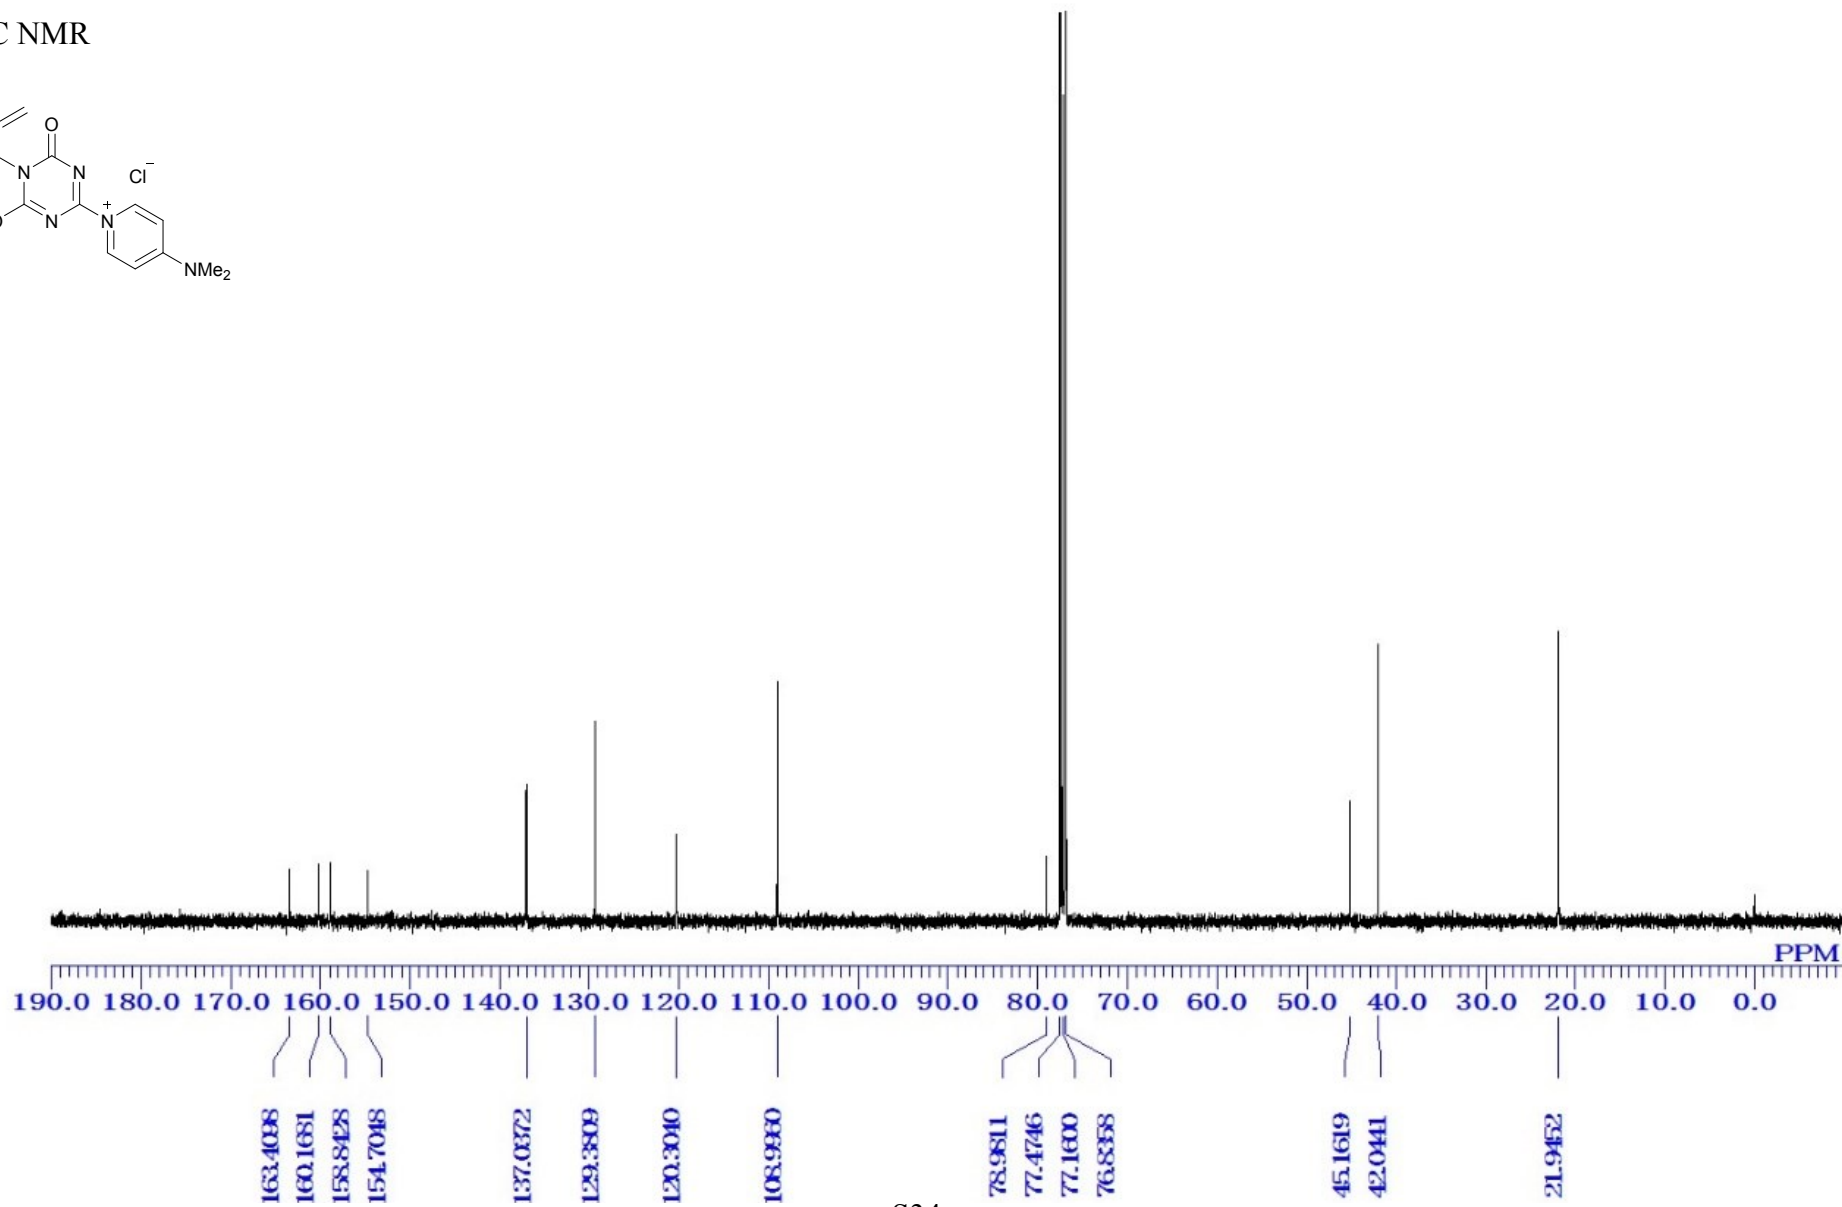

S34

<sup>1</sup>H NMR  
13

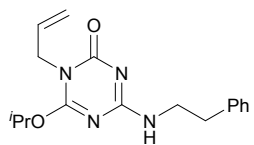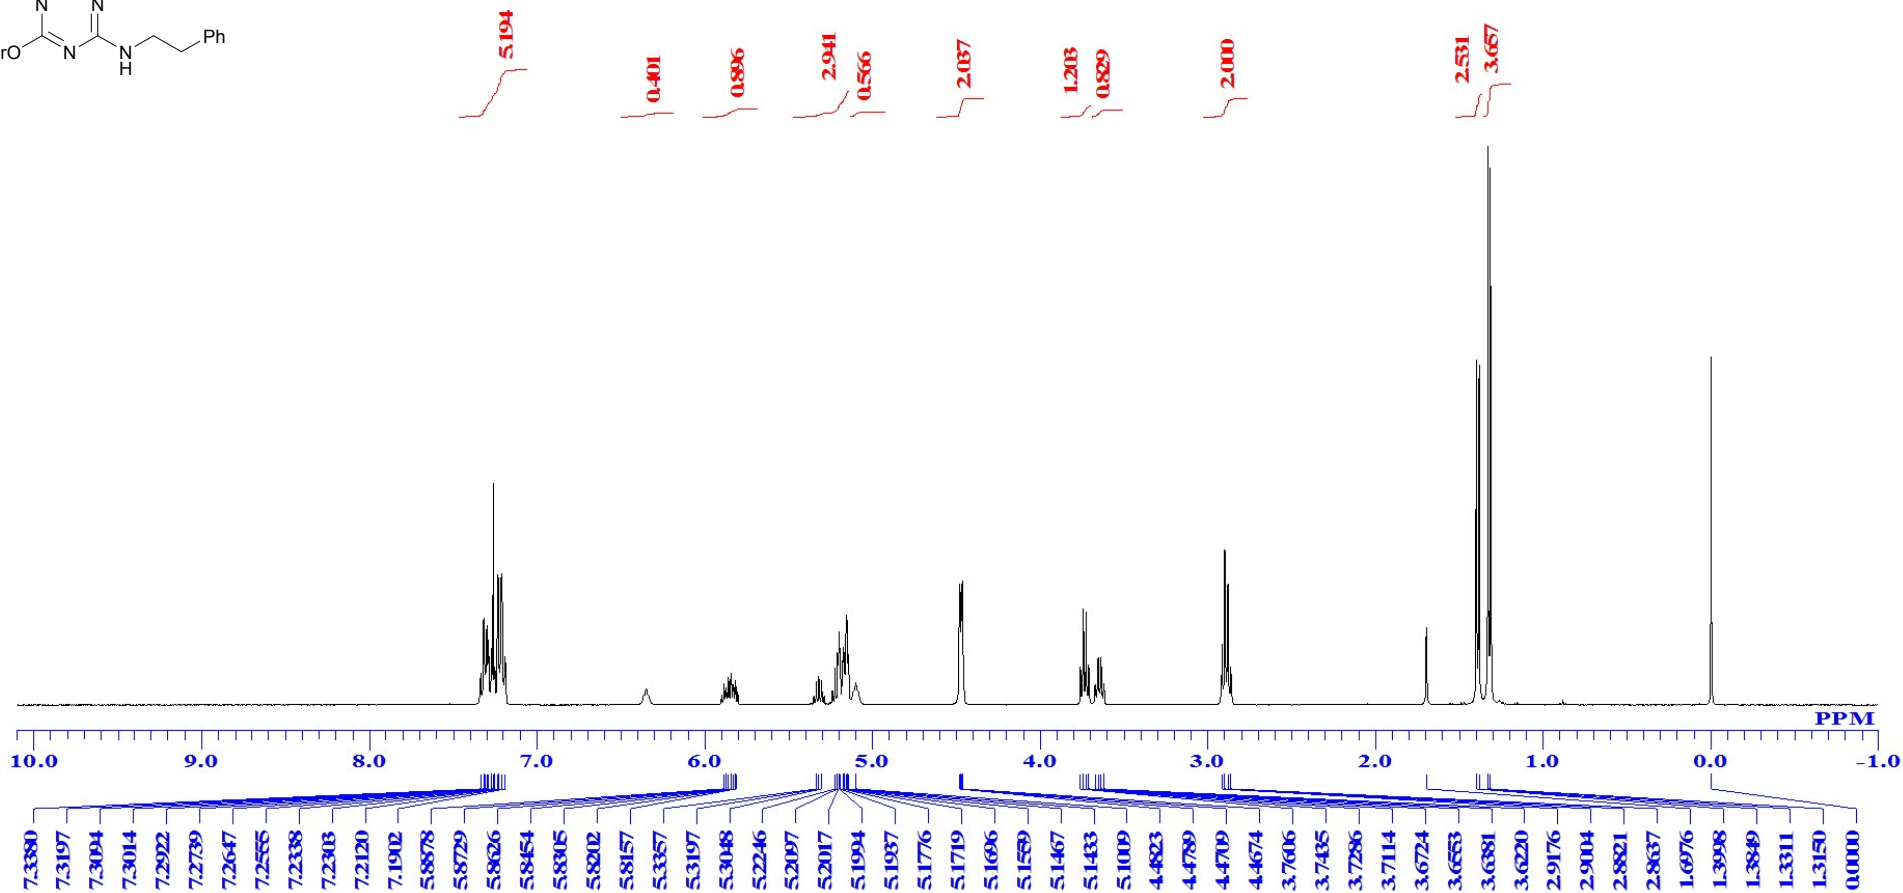

<sup>13</sup>C NMR

**13**

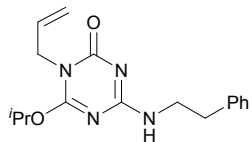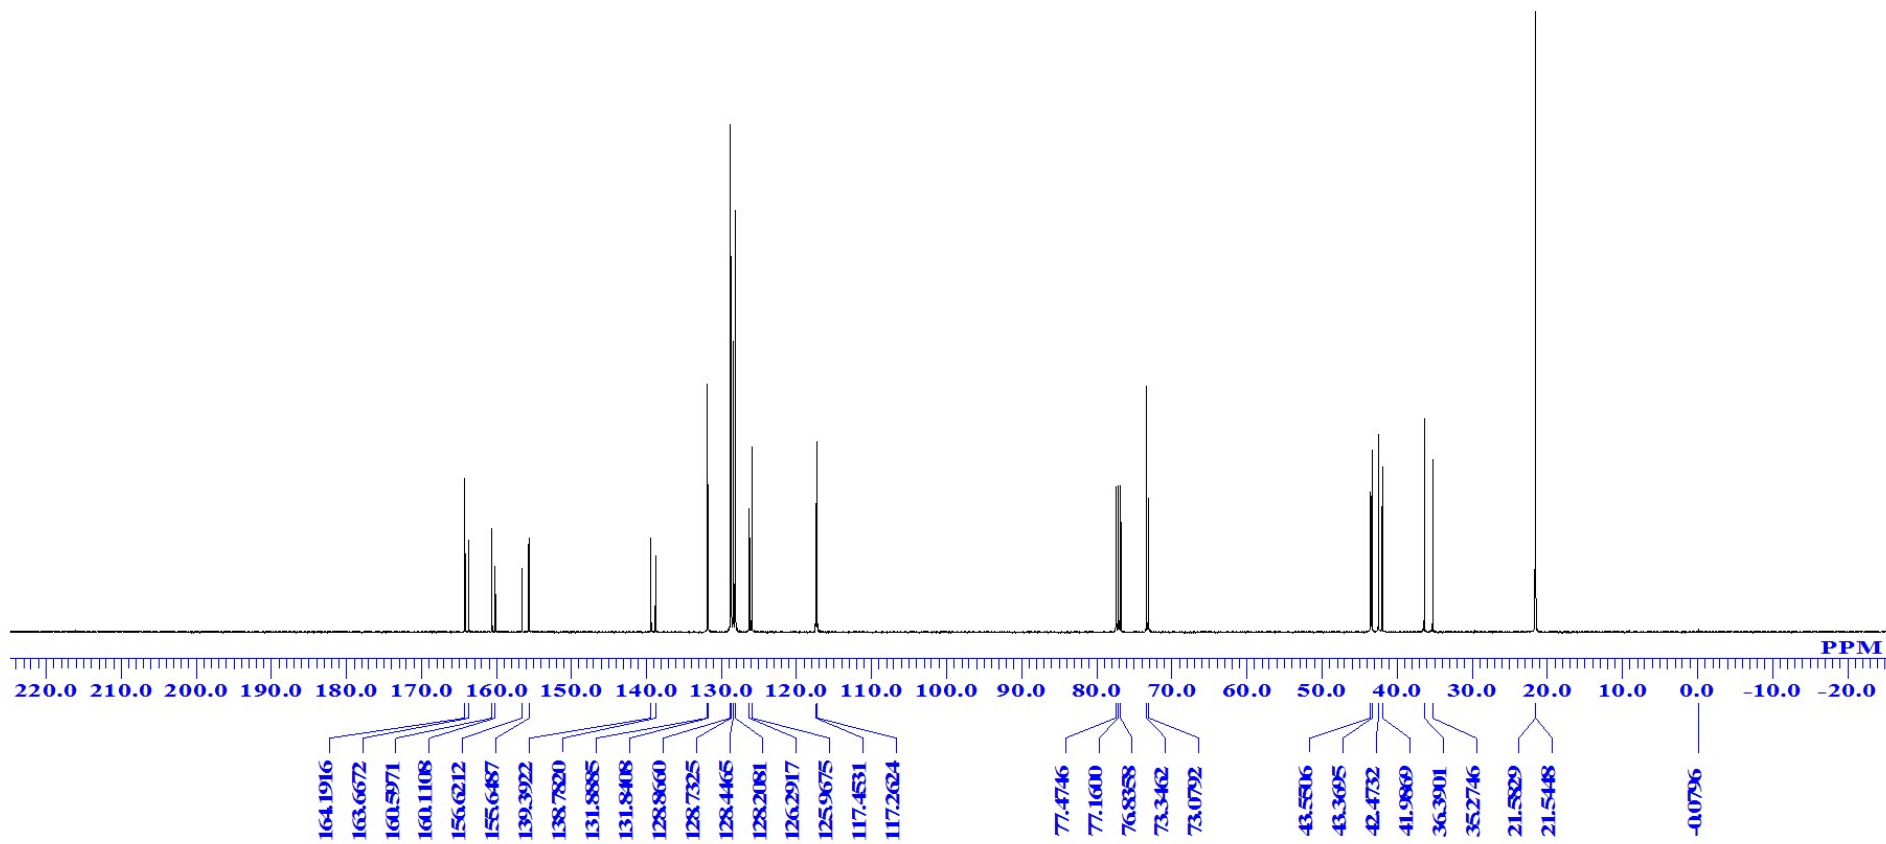

Supplement: d1ob00450f1.pdf [file d1ob00450f1.pdf]
